# Supplementary material for: Large-scale brain network dynamics in very preterm children and relationship with socio-emotional outcomes: an exploratory study
Source: PubMed Central journal article supplement (PMC10313511; doi:10.1038/s41390-022-02342-y), 2022-11-03
Supplement: 41390_2022_2342_MOESM1_ESM.pdf [file 41390_2022_2342_MOESM1_ESM.pdf]

# Supplementary Materials

## Supplementary Methods

### Participants

227 VPT children born before 32 gestational weeks between 01.01.2008 and 01.05.2013, in the Neonatal Unit at the Geneva University Hospital (Switzerland) and followed up at the Division of Child Development and Growth, were invited to participate in the “Vis-à-vis interventional study” between January 2017 and July 2019. VPT children were excluded if they had a Fluid-Crystallized Index (FCI, as measured by the Kaufman Assessment Battery for Children – 2nd Edition (K-ABC-II<sup>63</sup>)) below 70, sensory or physical disabilities (cerebral palsy, blindness, hearing loss), or an insufficient understanding of French. These exclusion criteria were determined based on medical record hold by the Division of Child Development and Growth at the Geneva University Hospital (Switzerland). The FCI was also completed as part of the current study (see Methods section). A total of 45 VPT participants aged between 6 to 9-year-old were enrolled. Of note, we attribute the small percentage of participation in the current study, i.e., 19.8 %, due to the fact that the data collected here were part of an intervention study mentioned above “Vis-à-vis interventional study”. The data used in the current study are the data collected at baseline, before any intervention were conducted. Moreover, 17 term-born controls aged between 6 to 9-year-old were recruited through the community.

Of the 62 enrolled participants, 9 participants were excluded as they did not complete both the brain MRI scan and the neuropsychological assessment (VPT, n=7; full-term controls, n=2); and 13 participants were excluded due to high level of motion artefacts in the rs-fMRI sequence (VPT, n=10; full-term controls, n=3). The final sample included 40 participants between 6 and 9 years of age: 28 VPT (15 females, 13 males; mean age in months (standard deviation) = 97.82 (13.92)) and 12 full-term participants (5 females, 7 males; mean age in months (standard deviation) = 94.83 (14.44)), Table 1.

### **Demographic and Neuropsychological measures**

Socio-economic status of the parents was estimated using the Largo scale, a validated 12-point score based on maternal education and paternal occupation.<sup>64</sup> Higher largo scores reflect lower socio-economic status of the parents. This score was developed by R Largo developmental paediatrician for large population based outcome studies and particularly adapted to the Swiss population.

Hand preference (i.e., right or non-right handedness) was established by asking the child which hand he/she uses to write and draw.

The Kaufman Assessment Battery for Children – 2nd Edition (K-ABC-II<sup>63</sup>) was used to evaluate the Fluid-Crystallized Index (FCI) as a measure of general intellectual functioning. For children younger than 7 years of age (i.e., in the VPT group, n= 7; in the FT group, n=3), the FCI is

derived from a linear combination of 11 core subtests; and for older children, it is derived from 10 core subtests. The FCI have a mean of 100 and a standard deviation of 15.

Participants' socio-emotional outcomes was assessed using four different measures:

- The Theory of Mind subtest of the NEPSY-II <sup>65</sup> giving a total score measuring the ability to understand mental contents, such as belief, intention or deception. As the Theory of Mind subtest does not provide a standard score, raw scores were regressed on age at testing and socio-economic status (i.e., Largo score). Standardised residuals were used as a score, called theory of mind.
- The Affect Recognition subtest of the Developmental Neuropsychological Assessment - 2nd Edition (NEPSY-II <sup>65</sup>) giving a total score assessing facial emotional recognition. For consistency with the previous NEPSY-II subtest, raw scores were regressed on age at testing and socio-economic status (i.e., Largo score). Standardised residuals were used as a score, called affect recognition.
- The Internalised Score subscale of the Strength and Difficulties Questionnaire – parent version (SDQ), was used to assess emotional and peer problems in daily life.<sup>66,67</sup> It assesses participant's internalised difficulties over the previous 6 months. The Internalised Score of the SDQ is scored on a Likert scale and is the sum of the scales emotional and peer problems. As standardised scores are not available for this measure, raw scores were regressed on age at testing and socio-economic status (i.e., Largo score). Standardised residuals were used as a score, called "internalised problems". High internalised scores reflect increased internalised difficulties in daily life.

- The Emotional Control Scale of the Behaviour Rating Inventory of Executive Function, parent version (BRIEF<sup>68</sup>) was used to measure the extent to which the child is able to mediate emotional responses in daily life. As standardised scores are available for this measure, standardised scores were used (mean = 50, SD = 10) and regressed on socio-economic status (i.e., Largo score). Standardised residuals were used as a score, called emotional control. Higher emotional control scores reflect increased difficulties in emotional control.

## **Magnetic Resonance Imaging (MRI) acquisition and preprocessing**

### Magnetic Resonance Imaging acquisition

MRI data were acquired at the Campus Biotech in Geneva, Switzerland, using a Siemens 3T Magnetom Prisma scanner. All participants completed a simulated “mock” MRI session prior to their MRI scan. This preparation process was conducted by trained research staff and allowed participants to familiarise themselves with the scanner and the scanning process, eventually raising any concerns they might have had prior to the MRI scan. Furthermore, this process is known to facilitate acquisition of good quality MRI images in children.<sup>69,70</sup> Structural T1-weighted MP-RAGE (magnetization-prepared rapid gradient-echo) sequences were acquired using the following parameters: voxel size =  $0.9 \times 0.9 \times 0.9 \text{ mm}^3$ ; repetition time (TR) = 2,300 ms; echo time (TE) = 2.32 ms; inversion time (TI) = 900 ms; flip angle (FA) =  $8^\circ$ ; and field of view (Fov) = 240 mm. Resting-state functional images were T2\*-weighted with a multislice gradient-echo-planar imaging (EPI) sequence

of 64 slices; voxel size =  $2 \times 2 \times 2 \text{ mm}^3$ ; TR = 720 ms; TE = 33 ms; Fov = 208 mm; 500 frames; acquisition time = 6 minutes. During the rs-fMRI sequence, children were asked to keep their eyes closed and engage in mind wandering. These children were constantly monitored and research staff were talking to the children before and after each MRI sequence. Moreover, an eye-tracking camera in the MRI scanner allowed to see the children's eyes and evaluate their awakening level. It is therefore unlikely that any of these children felt asleep during rs-fMRI acquisition. Finally, a fieldmap was acquired each time a participant entered the scanner, with TR = 627 ms; TE1 = 5.19 ms; TE2 = 7.65 ms; and FA =  $60^\circ$ .

#### Resting-State functional MRI data preprocessing

Our data were preprocessed using SPM12 (Wellcome Department of Imaging Neuroscience, UCL, UK) in MATLAB R2016a (The MathWorks, Inc., Natick, Massachusetts, United States). Rs-fMRI data were converted from the native DICOM to NIFTI format and the preprocessing pipeline described by Freitas, Liverani and colleagues was used.<sup>71</sup> Rs-fMRI images were spatially realigned and unwarped using the fieldmap images acquired, respectively, to correct for motion artefacts and potential geometric distortions. The unwarping step allows to improve the co-registration between structural and functional images and to reduce the distortion variability across subjects during spatial normalisation to a common space.<sup>72</sup> Functional images were then coregistered to their corresponding structural images in subject space and smoothed with a Gaussian filter of full width at half maximum (FWHM) = 6 mm. Structural images were segmented with the SPM12 segmentation algorithm to automatically identify different tissue types within the images, i.e., grey matter, white matter, cerebrospinal fluid;<sup>73</sup> and a study-specific

template was generated using Diffeomorphic Anatomical Registration using Exponential Lie algebra (DARTEL <sup>74</sup>) that will be used in the Innovation-Driven Co-Activation Patterns (iCAPs) framework described below. Finally, the first five rs-fMRI images were excluded, and average white matter and cerebrospinal fluid signals were regressed out from the BOLD time series. For each participant, preprocessed functional images were also check individually for inclusion of the whole cerebrum and of the cerebellum.

### Head motion

For rs-fMRI data, the mean framewise displacement for each frame was computed to quantify the extent of head motion from volume to volume for each participant.<sup>75,76</sup> Following Power and colleagues' recommendations, volume censoring ("scrubbing") for motion correction were applied to frames with a mean framewise displacement above 0.5 mm, as well as one frame before and two after. Moreover, if more than 20% of the frames had to be scrubbed, the participant was removed from further analyses. Based on these criteria, 10 VPT and 3 full-term control participants were excluded from further analyses.

## **Innovation-Driven Co-Activation Patterns (iCAPs) and extraction of iCAPs activation measures**

### Innovation-Driven Co-Activation Patterns (iCAPs)

Innovation-driven-co-activation-pattern (iCAP) analysis is a novel state-of-the-art rs-fMRI analysis tool that allows to derive a set of whole-brain spatial patterns of regions whose activity simultaneously increases or decreases, thus characterised by similar functional dynamic behaviour.<sup>22</sup> For a comprehensive explanation of the methodology and procedure, we refer to Karahanoglu and colleagues (2015) and to Zöller and colleague (2019). We tailored the openly available MATLAB code (<https://c4science.ch/source/iCAPs/>) MATLAB vR2016a (The MathWorks, Inc., Natick, MA) to apply the iCAPs framework in VPT and full-term participants. The overall routine is composed of 4 steps:

- Total activation (TA): First, TA applies a voxel-wise hemodynamically-informed deconvolution<sup>77,78</sup> to the fMRI timeseries in a way that promotes the temporal sparsity of activity transients and spatially coherent activations. TA provides three types of information: (1) activity-related signals that are denoised fMRI signals; (2) sustained, or block-type, activity-inducing signals that are deconvolved signals; (3) innovation signals that are the derivative of the activity-inducing signals and encode transient brain activity episodes as spikes.
- Detection of significant transients: Innovation signals are computed as the temporal derivative of the deconvolved signals. The obtained signals can be seen as a representation in terms of transients in brain activity, where large amplitude transients implicitly identify change-points. Significant transients were determined using a two-step thresholding procedure. A temporal threshold estimated from a surrogate distribution, keeping only transients larger than 95% or lower than 5%. Then, a spatial thresholding procedure was applied, in which a frame was considered significant if at least 5% of the grey matter voxels were active. The frames

showing significant transients are called innovation frames, and allow to identify time-points when a given region in the brain undergoes an increase or decrease in activity.

- Aggregation: The significant, i.e. innovation, frames were warped into MNI (Montreal Neurologic Institute) space via a study-specific DARTEL template previously created (see preprocessing). All frames were then aggregated for clustering.
- Temporal clustering: The retained innovation frames, underwent K-means clustering to label timepoints with consistent brain patterns of transitions, i.e., iCAPs. The optimum number of 13 clusters was determined by consensus clustering and following recommendation of previous studies<sup>23,78,79</sup> (Supplementary Figure S1 & S2).
- Time courses extraction: Time courses were obtained for all iCAPs using spatiotemporal transient-informed regression.<sup>21</sup>

### iCAPs labelling

To guide iCAPs labelling, previous studies using the iCAPs framework were used as reference.<sup>23,24,80,81</sup> Moreover, the Dice coefficient of similarity was completed to examined similarities between the iCAPs retrieved and the Yeo's 17 cortical resting-state networks.<sup>82</sup> The Dice coefficient is a measure of the extent of overlap between activation maps obtained on two or more occasions.<sup>83,84</sup> It was calculated as

follow:  $2 \times V_{\text{overlap}} / (V_1 + V_2)$

$V_{\text{overlap}}$  is the number of overlapping voxels,  $V_1$  is the number of voxels activated in image 1, and  $V_2$  is the number of voxels activated in image 1. A Dice coefficient of 0 implies no overlap at all between activations, whereas a Dice coefficient of 1 implies perfect overlap.



### Extraction of temporal properties

For computation of temporal properties, iCAPs' time series were recovered by backprojecting each iCAP into subjects' activity-inducing signals; i.e., block-type activity representations recovered by TA. For each iCAP, we then computed two measures representing the temporal characterisation of iCAPs: 1) occurrence, i.e., the number of activation blocks; 2) total duration, i.e., the total duration of overall activation as percentage of the total non-motion scanning time.

To explore the dynamic interactions during resting-state, coupling and anticoupling duration of each pair of iCAPs were calculated as time points of same-signed or oppositely signed coactivation measured as percentage of the total non-motion scanning time or as Jaccard score; i.e., percent joint activation time of the two respective iCAPs.

### Extraction of laterality measure

To explore the laterality of brain networks, the iCAPs maps were co-registered MNI symmetrical template, available at <http://www.bic.mni.mcgill.ca/ServicesAtlases/ICBM152NLin2009>. Based on previous studies, the laterality of activity maps aimed at exploring possible asymmetry effect between the two hemispheres by comparing lateralised amplitude maps of the iCAPs.<sup>85</sup> Therefore, the amplitudes of these patterns reflect the mean activity amplitude for each voxel when contributing to a certain network. In order to obtain a Laterality Index (LI) for each voxel, we flipped the left hemisphere maps and subtracted them from unflipped right hemisphere maps.<sup>81</sup>

Positive and negative values in these LI maps reflect, respectively, right and left lateralisation. These maps were then averaged for each iCAPs in order to obtain one LI for each iCAPs and each participant.

## **Statistical analyses**

### Group comparisons of iCAPs activation measures

Measures of occurrence and total duration of each iCAPs as well as coupling and anticoupling between each pair of iCAPs were compared between the VPT and full-term groups using general linear model and adding socio-economic status and sex as covariate to the model. The LI measure was compared between the VPT and full-term groups using general linear model and adding hand-preference, socio-economic status and sex as covariate to the model. The p values were corrected for multiple comparisons with the false discovery rate (FDR <sup>86</sup>).

Analyses were performed using the R software version 4.0.3, and R studio version 1.3.1093.<sup>87,88</sup>

### Multivariate correlation between iCAPs' time courses and socio-emotional measures

To evaluate multivariate patterns of correlation between iCAPs temporal characteristic and socio-emotional measures, we used partial least squares correlation (PLSC). A publicly available PLSC implementation in MATLAB was used: <https://github.com/danizoeller/myPLS>.<sup>89,90</sup>

PLSC is a data-driven multivariate technique that maximizes the covariance between two matrices by identifying latent components which are linear combinations of the two matrices, i.e., socio-emotional and iCAPs temporal characteristics measures.<sup>91</sup>

For the socio-emotional scores, the 4 scores of affect recognition, theory of mind, internalised problems and emotional control were considered. For affect recognition, theory of mind and internalised problems, raw scores were regressed on age at testing and socio-economic status (i.e., Largo score) confounds, and the standardised residuals were used for each score. For emotional control, standard scores were regressed on socio-economic status (i.e., Largo score) and the standardised residuals were used. Socio-emotional scores were stored in a 40 x 4 matrix denoted X, in which each row represents one participant and the matrix's 4 columns consist of the 4 socio-emotional scores considered. For each iCAPs temporal characteristics, PLSC was repeated four times, each time considering only one temporal characteristics, i.e., occurrence, total duration, coupling, anticoupling. First, occurrence measures were gathered in a 40 x 13 matrix denoted Y, with each row matching one participant and each column representing the occurrence of each of the 13 iCAPs. Second, total duration measures were gathered in a 40 x 13 matrix denoted Y, with each row matching one participant and each column representing the total duration of each of the 13 iCAPs. Third, coupling measures were stored in a 40 x 78 matrix denoted Y, in which each row represents one participant and the matrix's 78 columns consists of the coupling duration for each pair of iCAPs. Finally, anticoupling measures were stored in a 40 x 78 matrix denoted Y, in which each row represents one participant and the matrix's 78 columns consists of the anticoupling duration for each pair of iCAPs. A cross-covariance matrix was then computed between X (participants x socio-emotional scores) and Y (participants x iCAPs temporal characteristics). Singular value decomposition was then applied to this cross-covariance matrix, resulting in latent components. Statistical significance of multivariate correlation patterns, i.e., latent component, was assessed with permutation testing (1000 permutations) and considered robust at  $p < 0.01$  following guidelines of previous studies.<sup>23,91</sup> Stability of saliences

were estimated using bootstrapping (500 bootstrap samples with replacement). Bootstrap ratio z-scores for each socio-emotional measure and iCAPs temporal characteristics were obtained by dividing each socio-emotional and iCAPs temporal characteristics weight by its bootstrap-estimated standard deviation, and a p-value was obtained for each bootstrap ratio z-score. The contribution of socio-emotional and iCAPs temporal characteristics weights for a given latent component was considered robust at  $p < 0.01$  (i.e., absolute bootstrap ratio z-scores above 3 or below -3).

## Supplementary Figures

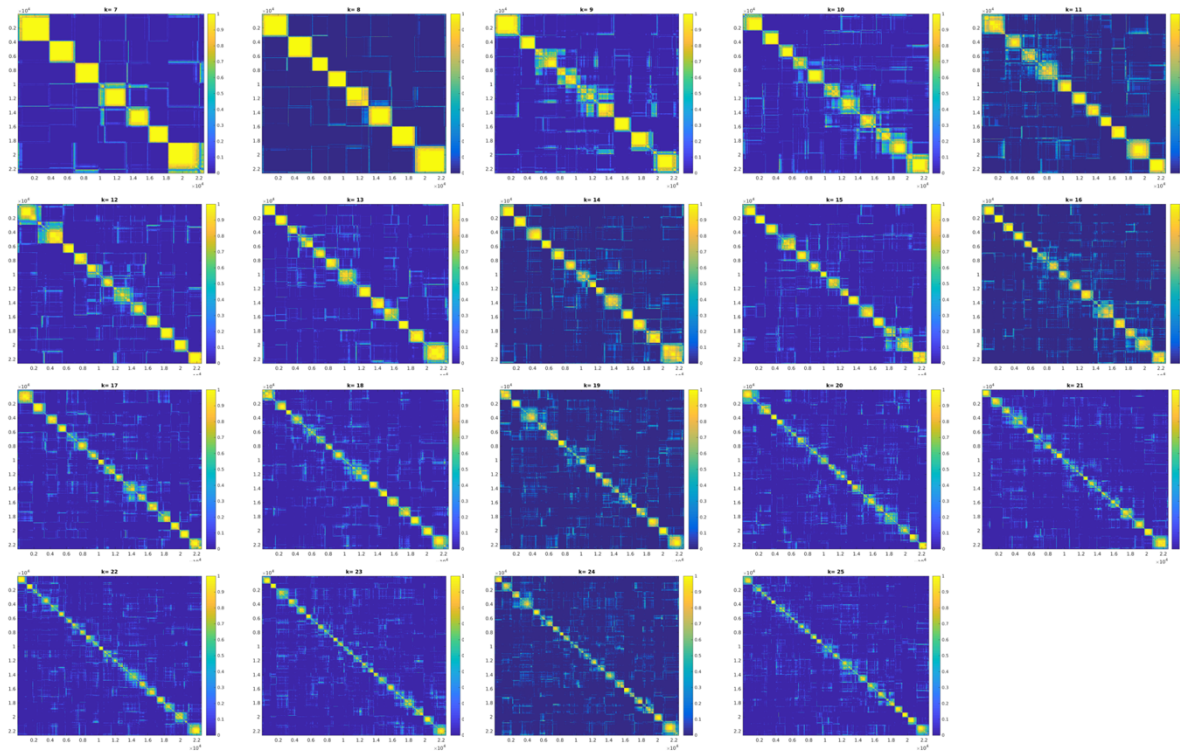

**Figure S1.** Consensus matrices for cluster numbers  $K = 7$  to  $K = 25$ . High values in the matrix indicate that the two corresponding frames were clustered together during re-sampling. A value of 1 means that the frames were always clustered together, while a value of 0 means that the frames were never clustered together. We selected to use  $K = 13$  based on visual inspection of the consensus matrices and evaluation of consensus clustering quality measures (Monti et al., 2003). In Supplementary Figure S2, we plot the distribution of average consensus values per cluster to assess the quality of the clustering for each  $K$ .

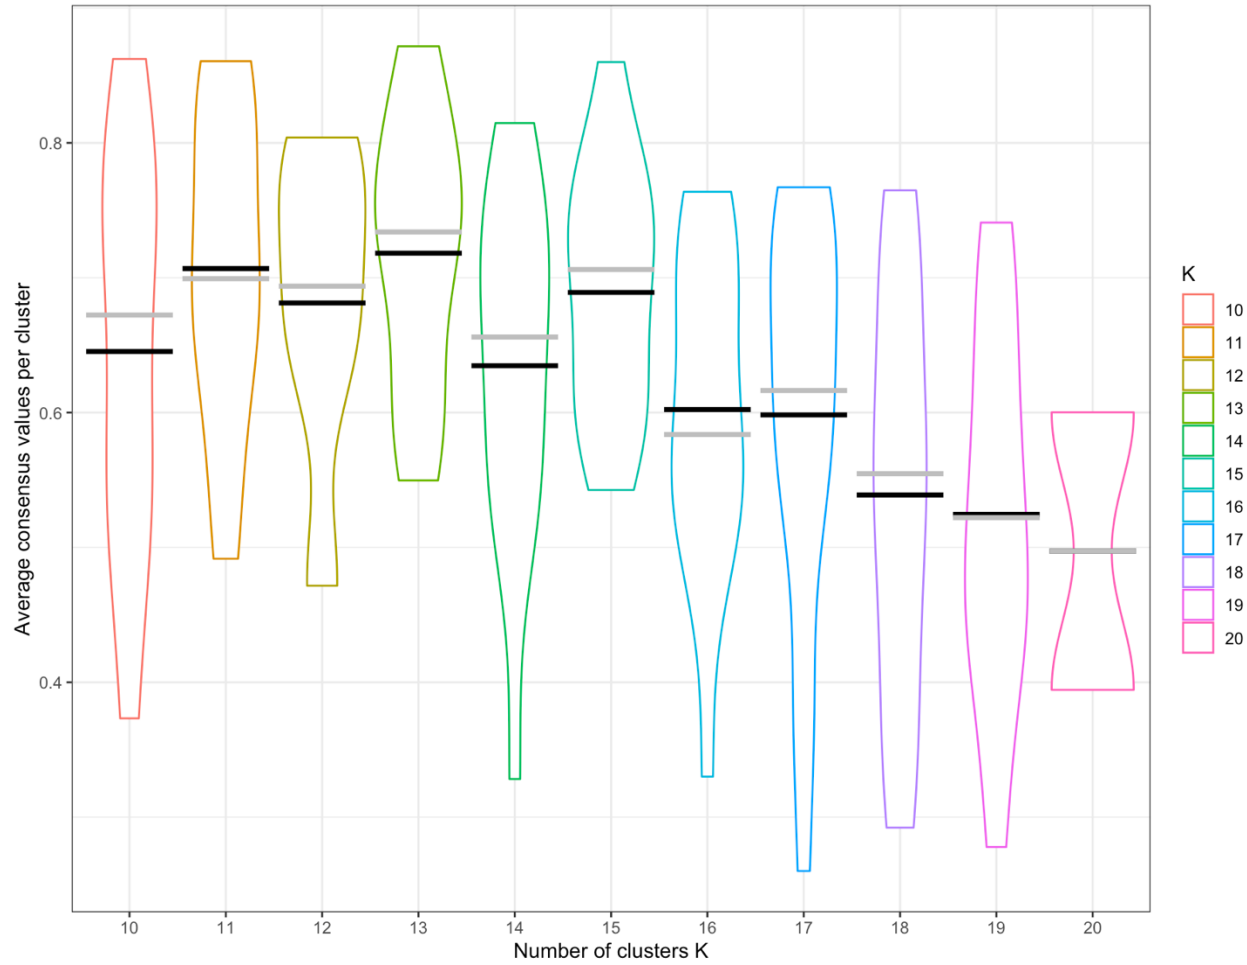

**Figure S2.** Consensus clustering quality measures for cluster numbers  $K = 10$  to  $K = 20$ . The distribution of average consensus values per cluster: the mean for each cluster is represented by a black line and the median is represented by a grey line. Mean consensus is maximal (closest to 1) for  $K = 13$ .

## Supplementary Tables

**Table S1.** iCAPs functional networks of regions from the automated anatomical labeling 2 (AAL2) atlas. Percentiles indicate the fraction of voxels of a functional network or region that have a z-score > 2.3. A network/region is listed if more than 20% of the network/region is included in the iCAP.

| <b>iCAP</b>   | <b>Lobe</b>     | <b>Region</b>     | <b>Percentile</b> | <b>mean z-score</b> | <b>voxels</b> |
|---------------|-----------------|-------------------|-------------------|---------------------|---------------|
| <b>iCAP 1</b> | Parietal        | Parietal_Sup_R    | 64.82             | 2.14                | 457           |
|               | Parietal        | Parietal_Sup_L    | 64.6              | 2.12                | 480           |
|               | Occipital       | Occipital_Sup_L   | 52.4              | 2.11                | 164           |
|               | Occipital       | Occipital_Sup_R   | 50.49             | 2.18                | 154           |
|               | Parietal        | Angular_R         | 29.57             | 1.97                | 225           |
|               | Posterior Fossa | Cerebelum_6_R     | 27.52             | 1.8                 | 368           |
|               | Parietal        | Precuneus_L       | 23.9              | 1.92                | 365           |
|               | Parietal        | Precuneus_R       | 23.21             | 1.84                | 331           |
|               | Posterior Fossa | Cerebelum_Crus1_L | 19.67             | 1.71                | 302           |
|               | Posterior Fossa | Cerebelum_Crus1_R | 18.27             | 1.72                | 273           |
|               | Posterior Fossa | Cerebelum_6_L     | 17.7              | 1.65                | 229           |
|               | Parietal        | Parietal_Inf_L    | 16.4              | 1.84                | 208           |
|               | Occipital       | Cuneus_R          | 14.68             | 1.75                | 74            |
|               | Occipital       | Occipital_Mid_R   | 13.65             | 1.94                | 107           |
|               | Occipital       | Occipital_Mid_L   | 12.91             | 2.05                | 143           |
|               | Occipital       | Cuneus_L          | 11.24             | 1.78                | 79            |
|               | Parietal        | Parietal_Inf_R    | 10.16             | 1.65                | 78            |
| <b>iCAP 2</b> | Parietal        | SupraMarginal_L   | 79.53             | 2.73                | 470           |
|               | Central         | Rolandic_Oper_L   | 62.3              | 2.07                | 304           |
|               | Parietal        | SupraMarginal_R   | 62.06             | 2.68                | 535           |
|               | Frontal         | Rolandic_Oper_R   | 58.16             | 2.04                | 342           |
|               | Central         | Postcentral_L     | 57.39             | 2.2                 | 652           |

|               |                 |                    |       |      |     |
|---------------|-----------------|--------------------|-------|------|-----|
|               | Central         | Precentral_R       | 57.39 | 1.96 | 621 |
|               | Central         | Postcentral_R      | 49.44 | 2.48 | 613 |
|               | Temporal        | Heschl_L           | 35.81 | 1.74 | 53  |
|               | Central         | Precentral_L       | 35.13 | 1.82 | 372 |
|               | Frontal         | Supp_Motor_Area_R  | 33.33 | 1.82 | 121 |
|               | Temporal        | Temporal_Sup_L     | 30.44 | 2.12 | 309 |
|               | Frontal         | Supp_Motor_Area_L  | 29.17 | 1.82 | 119 |
|               | Limbic          | Insula_L           | 26.58 | 1.79 | 248 |
|               | Temporal        | Heschl_R           | 25.76 | 1.68 | 17  |
|               | Limbic          | Insula_R           | 24.33 | 1.75 | 236 |
|               | Limbic          | Cingulate_Mid_L    | 21.08 | 1.81 | 219 |
|               | Limbic          | Cingulate_Mid_R    | 20.57 | 1.81 | 224 |
|               | Parietal        | Parietal_Inf_L     | 20.43 | 2.31 | 259 |
|               | Frontal         | Frontal_Inf_Oper_L | 16.27 | 1.75 | 61  |
|               | Frontal         | Frontal_Inf_Oper_R | 15.52 | 1.64 | 88  |
|               | Temporal        | Temporal_Sup_R     | 10.06 | 1.87 | 104 |
| <b>iCAP 3</b> | Posterior Fossa | Cerebelum_4_5_R    | 83.05 | 2.1  | 544 |
|               | Posterior Fossa | Vermis_9           | 81.72 | 1.83 | 76  |
|               | Posterior Fossa | Vermis_3           | 80.95 | 1.87 | 17  |
|               | Posterior Fossa | Cerebelum_4_5_L    | 75.31 | 2.05 | 540 |
|               | Posterior Fossa | Vermis_4_5         | 67.33 | 2.01 | 204 |
|               | Posterior Fossa | Cerebelum_9_R      | 62.07 | 1.74 | 36  |
|               | Posterior Fossa | Cerebelum_3_R      | 54.84 | 1.97 | 17  |
|               | Posterior Fossa | Vermis_8           | 46.58 | 1.63 | 68  |
|               | Posterior Fossa | Cerebelum_3_L      | 38.46 | 1.85 | 5   |
|               | Posterior Fossa | Cerebelum_9_L      | 36.36 | 1.67 | 20  |
|               | Posterior Fossa | Vermis_7           | 27.01 | 1.6  | 37  |
|               | Occipital       | Fusiform_R         | 22.68 | 1.83 | 276 |



|               |                 |                      |       |      |      |
|---------------|-----------------|----------------------|-------|------|------|
|               | Posterior Fossa | Vermis_6             | 20.97 | 1.65 | 56   |
|               | Posterior Fossa | Cerebelum_6_L        | 19.09 | 1.74 | 247  |
|               | Posterior Fossa | Cerebelum_6_R        | 15.56 | 1.74 | 208  |
|               | Occipital       | Fusiform_L           | 14.74 | 1.82 | 175  |
|               | Occipital       | Lingual_R            | 14.69 | 1.82 | 144  |
|               | Posterior Fossa | Vermis_1_2           | 12.5  | 1.71 | 1    |
|               | Occipital       | Lingual_L            | 10.48 | 1.79 | 103  |
| <b>iCAP 4</b> | Parietal        | Parietal_Sup_L       | 99.06 | 2.51 | 736  |
|               | Parietal        | Parietal_Sup_R       | 99.01 | 2.35 | 698  |
|               | Frontal         | Paracentral_Lobule_R | 92.68 | 2.02 | 76   |
|               | Frontal         | Paracentral_Lobule_L | 88.69 | 2.41 | 149  |
|               | Parietal        | Parietal_Inf_R       | 84.11 | 2.03 | 646  |
|               | Frontal         | Supp_Motor_Area_R    | 83.2  | 2.1  | 302  |
|               | Parietal        | Parietal_Inf_L       | 80.84 | 2.02 | 1025 |
|               | Central         | Postcentral_R        | 70.73 | 2.32 | 877  |
|               | Frontal         | Supp_Motor_Area_L    | 69.85 | 2.11 | 285  |
|               | Central         | Postcentral_L        | 51.41 | 2.4  | 584  |
|               | Central         | Precentral_R         | 48.24 | 2.19 | 522  |
|               | Occipital       | Occipital_Sup_R      | 43.28 | 1.87 | 132  |
|               | Parietal        | Angular_R            | 43.23 | 1.93 | 329  |
|               | Central         | Precentral_L         | 40.13 | 2.22 | 425  |
|               | Occipital       | Occipital_Sup_L      | 39.3  | 1.89 | 123  |
|               | Parietal        | Precuneus_L          | 37    | 2.31 | 565  |
|               | Frontal         | Frontal_Sup_2_R      | 34.5  | 2.41 | 376  |
|               | Parietal        | Precuneus_R          | 30.86 | 1.98 | 440  |
|               | Frontal         | Frontal_Sup_2_L      | 24.28 | 2.3  | 219  |
|               | Parietal        | Angular_L            | 21.94 | 1.8  | 129  |
|               | Limbic          | Cingulate_Mid_R      | 20.48 | 1.63 | 223  |

|               |                 |                   |       |      |      |
|---------------|-----------------|-------------------|-------|------|------|
|               | Parietal        | SupraMarginal_L   | 14.72 | 1.73 | 87   |
|               | Limbic          | Cingulate_Mid_L   | 14.53 | 1.59 | 151  |
|               | Occipital       | Occipital_Mid_L   | 12.18 | 1.86 | 135  |
|               | Parietal        | SupraMarginal_R   | 10.9  | 1.75 | 94   |
|               | Occipital       | Cuneus_R          | 10.71 | 1.69 | 54   |
| <b>iCAP 5</b> | Frontal         | Frontal_Med_Orb_L | 100   | 1.53 | 1    |
|               | Limbic          | Cingulate_Post_L  | 96.28 | 3.15 | 181  |
|               | Parietal        | Angular_L         | 92.52 | 2.96 | 544  |
|               | Limbic          | Cingulate_Post_R  | 89.16 | 3.07 | 74   |
|               | Parietal        | Angular_R         | 79.89 | 2.6  | 608  |
|               | Parietal        | Parietal_Inf_R    | 70.96 | 2.72 | 545  |
|               | Parietal        | Parietal_Inf_L    | 62.22 | 2.72 | 789  |
|               | Parietal        | Precuneus_L       | 54.94 | 2.64 | 839  |
|               | Parietal        | Precuneus_R       | 45.93 | 2.69 | 655  |
|               | Limbic          | Cingulate_Mid_L   | 43.89 | 2.59 | 456  |
|               | Limbic          | Cingulate_Mid_R   | 41.41 | 2.72 | 451  |
|               | Frontal         | Frontal_Med_Orb_R | 33.33 | 1.6  | 15   |
|               | Parietal        | SupraMarginal_R   | 27.96 | 2.22 | 241  |
|               | Parietal        | Parietal_Sup_L    | 19.92 | 2.22 | 148  |
|               | Temporal        | Temporal_Mid_L    | 17.62 | 1.7  | 399  |
|               | Parietal        | Parietal_Sup_R    | 15.32 | 2.09 | 108  |
|               | Parietal        | SupraMarginal_L   | 10.49 | 1.91 | 62   |
|               | Limbic          | Cingulate_Ant_L   | 10.08 | 1.6  | 79   |
| <b>iCAP 6</b> | Posterior Fossa | Cerebelum_7b_R    | 100   | 2.17 | 46   |
|               | Posterior Fossa | Cerebelum_8_R     | 98.75 | 1.99 | 79   |
|               | Posterior Fossa | Cerebelum_Crus1_R | 97.52 | 2.65 | 1457 |
|               | Posterior Fossa | Cerebelum_Crus1_L | 95.77 | 2.51 | 1470 |
|               | Posterior Fossa | Vermis_8          | 95.21 | 1.93 | 139  |

|               |                 |                     |       |      |      |
|---------------|-----------------|---------------------|-------|------|------|
|               | Posterior Fossa | Cerebelum_6_R       | 91.4  | 2.42 | 1222 |
|               | Posterior Fossa | Cerebelum_9_L       | 90.91 | 1.77 | 50   |
|               | Posterior Fossa | Cerebelum_7b_L      | 90.22 | 1.9  | 83   |
|               | Posterior Fossa | Cerebelum_Crus2_L   | 89.57 | 2.21 | 713  |
|               | Posterior Fossa | Cerebelum_Crus2_R   | 88.65 | 2.29 | 609  |
|               | Posterior Fossa | Vermis_7            | 88.32 | 2.21 | 121  |
|               | Posterior Fossa | Vermis_9            | 88.17 | 1.91 | 82   |
|               | Posterior Fossa | Cerebelum_6_L       | 82.3  | 2.23 | 1065 |
|               | Posterior Fossa | Cerebelum_8_L       | 81.25 | 1.75 | 52   |
|               | Posterior Fossa | Cerebelum_9_R       | 74.14 | 1.81 | 43   |
|               | Posterior Fossa | Vermis_6            | 60.67 | 1.91 | 162  |
|               | Occipital       | Occipital_Inf_R     | 53.15 | 1.81 | 118  |
|               | Occipital       | Fusiform_R          | 40.51 | 2.13 | 493  |
|               | Occipital       | Lingual_R           | 36.84 | 1.97 | 361  |
|               | Occipital       | Fusiform_L          | 33.36 | 2    | 396  |
|               | Occipital       | Lingual_L           | 20.85 | 1.88 | 205  |
|               | Temporal        | Temporal_Inf_R      | 13.32 | 1.78 | 151  |
|               | Occipital       | Occipital_Inf_L     | 12.5  | 1.64 | 31   |
|               | Temporal        | Temporal_Inf_L      | 10.61 | 1.75 | 89   |
| <b>iCAP 7</b> | Frontal         | Frontal_Inf_Tri_R   | 99.7  | 3.12 | 655  |
|               | Frontal         | Frontal_Inf_Oper_R  | 99.12 | 2.95 | 562  |
|               | Central         | Frontal_Inf_Orb_2_R | 92.93 | 2.25 | 92   |
|               | Frontal         | Frontal_Mid_2_R     | 91.08 | 2.78 | 1593 |
|               | Frontal         | Rolandic_Oper_R     | 81.12 | 2.02 | 477  |
|               | Temporal        | Temporal_Pole_Mid_R | 78.57 | 1.82 | 22   |
|               | Parietal        | SupraMarginal_R     | 74.83 | 1.86 | 645  |
|               | Limbic          | Insula_R            | 73.09 | 2.1  | 709  |
|               | Temporal        | Temporal_Sup_R      | 72.05 | 1.92 | 745  |

|               |                          |                      |       |      |     |
|---------------|--------------------------|----------------------|-------|------|-----|
|               | Temporal                 | Temporal_Pole_Sup_R  | 69.19 | 1.97 | 128 |
|               | Frontal                  | OFCpost_R            | 66.67 | 1.55 | 4   |
|               | Frontal                  | Frontal_Sup_2_R      | 56.97 | 2.22 | 621 |
|               | Subcortical grey nucleus | Putamen_R            | 45.15 | 1.77 | 279 |
|               | Temporal                 | Heschl_R             | 43.94 | 1.98 | 29  |
|               | Parietal                 | Parietal_Inf_R       | 39.58 | 1.93 | 304 |
|               | Central                  | Postcentral_R        | 38.15 | 1.87 | 473 |
|               | Temporal                 | Temporal_Mid_R       | 36.18 | 1.82 | 683 |
|               | Central                  | Precentral_R         | 35.95 | 2.2  | 389 |
|               | Frontal                  | Frontal_Sup_Medial_R | 20.39 | 1.65 | 73  |
|               | Temporal                 | Temporal_Inf_R       | 11.2  | 1.61 | 127 |
|               | Central                  | Rolandic_Oper_L      | 98.57 | 2.8  | 481 |
|               | Limbic                   | Insula_R             | 98.56 | 2.55 | 956 |
|               | Limbic                   | Insula_L             | 98.07 | 2.66 | 915 |
|               | Temporal                 | Heschl_L             | 97.97 | 2.58 | 145 |
| <b>iCAP 8</b> | Frontal                  | Rolandic_Oper_R      | 97.79 | 2.58 | 575 |
|               | Temporal                 | Heschl_R             | 96.97 | 2.3  | 64  |
|               | Temporal                 | Temporal_Pole_Sup_R  | 92.97 | 2.35 | 172 |
|               | Temporal                 | Temporal_Pole_Mid_R  | 92.86 | 2.03 | 26  |
|               | Temporal                 | Temporal_Pole_Sup_L  | 90.07 | 2.28 | 127 |
|               | Subcortical grey nucleus | Putamen_R            | 86.89 | 2.17 | 537 |
|               | Subcortical grey nucleus | Putamen_L            | 83.92 | 2.21 | 407 |
|               | Frontal                  | OFCpost_R            | 83.33 | 1.83 | 5   |
|               | Subcortical grey nucleus | Amygdala_R           | 82.41 | 1.95 | 89  |
|               | Temporal                 | Temporal_Sup_L       | 80.99 | 2.23 | 822 |
|               | Frontal                  | Frontal_Inf_Orb_2_L  | 80.67 | 1.99 | 121 |
|               | Central                  | Frontal_Inf_Orb_2_R  | 77.78 | 1.94 | 77  |
|               | Subcortical grey nucleus | Amygdala_L           | 62.6  | 1.86 | 77  |

|               |                          |                     |       |      |      |
|---------------|--------------------------|---------------------|-------|------|------|
|               | Frontal                  | OFCpost_L           | 62.5  | 1.69 | 5    |
|               | Limbic                   | Hippocampus_R       | 53.23 | 1.77 | 107  |
|               | Subcortical grey nucleus | Pallidum_R          | 51.85 | 1.87 | 28   |
|               | Temporal                 | Temporal_Sup_R      | 50.39 | 2.02 | 521  |
|               | Frontal                  | Frontal_Inf_Tri_R   | 46.58 | 1.99 | 306  |
|               | Frontal                  | Frontal_Inf_Oper_L  | 44.53 | 2.05 | 167  |
|               | Frontal                  | Frontal_Inf_Tri_L   | 38.62 | 2.09 | 297  |
|               | Frontal                  | Frontal_Inf_Oper_R  | 34.04 | 2.26 | 193  |
|               | Frontal                  | Olfactory_R         | 28.67 | 1.91 | 43   |
|               | Limbic                   | Hippocampus_L       | 28.02 | 1.7  | 72   |
|               | Limbic                   | ParaHippocampal_R   | 25.97 | 1.78 | 120  |
|               | Parietal                 | SupraMarginal_L     | 23.01 | 2.16 | 136  |
|               | Subcortical grey nucleus | Pallidum_L          | 21.74 | 1.78 | 10   |
|               | Parietal                 | SupraMarginal_R     | 17.52 | 2.03 | 151  |
|               | Frontal                  | Olfactory_L         | 16.33 | 1.88 | 16   |
|               | Subcortical grey nucleus | Caudate_R           | 13.39 | 1.61 | 32   |
|               | Central                  | Postcentral_L       | 10.56 | 2.22 | 120  |
| <b>iCAP 9</b> | Frontal                  | Frontal_Inf_Tri_L   | 99.22 | 2.76 | 763  |
|               | Frontal                  | Frontal_Inf_Oper_L  | 98.93 | 2.67 | 371  |
|               | Frontal                  | Frontal_Mid_2_L     | 95.41 | 2.33 | 1434 |
|               | Frontal                  | Frontal_Inf_Orb_2_L | 95.33 | 2.16 | 143  |
|               | Central                  | Rolandic_Oper_L     | 91.8  | 1.92 | 448  |
|               | Parietal                 | SupraMarginal_L     | 88.16 | 1.99 | 521  |
|               | Temporal                 | Temporal_Sup_L      | 87.68 | 2.13 | 890  |
|               | Temporal                 | Temporal_Pole_Sup_L | 79.43 | 2.16 | 112  |
|               | Limbic                   | Insula_L            | 78.03 | 1.91 | 728  |
|               | Temporal                 | Heschl_L            | 75.68 | 1.84 | 112  |
|               | Frontal                  | OFCpost_L           | 75    | 1.69 | 6    |

|                |                          |                      |       |      |      |
|----------------|--------------------------|----------------------|-------|------|------|
|                | Temporal                 | Temporal_Mid_L       | 69.52 | 2.15 | 1574 |
|                | Central                  | Precentral_L         | 66.1  | 2.51 | 700  |
|                | Frontal                  | Frontal_Sup_2_L      | 64.19 | 1.89 | 579  |
|                | Parietal                 | Parietal_Inf_L       | 53.71 | 1.84 | 681  |
|                | Central                  | Postcentral_L        | 52.64 | 1.93 | 598  |
|                | Parietal                 | Angular_L            | 47.45 | 1.83 | 279  |
|                | Subcortical grey nucleus | Putamen_L            | 47.01 | 1.71 | 228  |
|                | Frontal                  | Frontal_Sup_Medial_L | 22.36 | 1.75 | 108  |
|                | Temporal                 | Temporal_Inf_L       | 21.1  | 1.68 | 177  |
| <b>iCAP 10</b> | Occipital                | Occipital_Mid_R      | 88.39 | 3.1  | 693  |
|                | Occipital                | Occipital_Mid_L      | 82.58 | 3.1  | 915  |
|                | Occipital                | Occipital_Inf_L      | 71.77 | 2.34 | 178  |
|                | Temporal                 | Temporal_Mid_R       | 55.56 | 2.79 | 1049 |
|                | Occipital                | Occipital_Inf_R      | 49.55 | 2.02 | 110  |
|                | Occipital                | Occipital_Sup_L      | 43.77 | 2.35 | 137  |
|                | Temporal                 | Temporal_Mid_L       | 41.03 | 2.31 | 929  |
|                | Occipital                | Occipital_Sup_R      | 31.15 | 2.26 | 95   |
|                | Occipital                | Cuneus_L             | 27.45 | 1.79 | 193  |
|                | Temporal                 | Temporal_Sup_R       | 27.27 | 2.05 | 282  |
|                | Parietal                 | Angular_R            | 26.68 | 1.97 | 203  |
|                | Parietal                 | Angular_L            | 21.77 | 1.89 | 128  |
|                | Temporal                 | Temporal_Inf_R       | 21.16 | 2.09 | 240  |
|                | Occipital                | Cuneus_R             | 18.45 | 1.74 | 93   |
|                | Occipital                | Calcarine_L          | 11.05 | 1.69 | 121  |
|                | Temporal                 | Temporal_Sup_L       | 11.03 | 1.85 | 112  |
|                | Temporal                 | Temporal_Inf_L       | 10.25 | 1.93 | 86   |
|                | Posterior Fossa          | Cerebelum_Crus2_R    | 10.19 | 1.64 | 70   |
|                | Occipital                | Calcarine_R          | 10.06 | 1.57 | 63   |

|                |                 |                      |                   |       |      |
|----------------|-----------------|----------------------|-------------------|-------|------|
| <b>iCAP 11</b> | Occipital       | Cuneus_L             | 99.86             | 2.98  | 702  |
|                | Occipital       | Cuneus_R             | 94.84             | 2.61  | 478  |
|                | Occipital       | Calcarine_R          | 94.09             | 3.62  | 589  |
|                | Occipital       | Occipital_Sup_L      | 84.66             | 2.06  | 265  |
|                | Occipital       | Calcarine_L          | 81.28             | 3.46  | 890  |
|                | Occipital       | Lingual_L            | 69.68             | 2.48  | 685  |
|                | Occipital       | Lingual_R            | 55.2              | 2.33  | 541  |
|                | Occipital       | Occipital_Sup_R      | 55.08             | 1.82  | 168  |
|                | Occipital       | Occipital_Mid_R      | 43.49             | 1.76  | 341  |
|                | Parietal        | Precuneus_R          | 43.27             | 2.79  | 617  |
|                | Occipital       | Occipital_Mid_L      | 42.96             | 1.88  | 476  |
|                | Parietal        | Precuneus_L          | 31.83             | 2.55  | 486  |
|                | Posterior Fossa | Cerebelum_4_5_L      | 11.44             | 1.92  | 82   |
|                | <b>iCAP 12</b>  | Frontal              | Frontal_Med_Orb_L | 100   | 4.19 |
| Frontal        |                 | Frontal_Med_Orb_R    | 95.56             | 3.19  | 43   |
| Limbic         |                 | Cingulate_Ant_R      | 94.95             | 3.05  | 470  |
| Frontal        |                 | Frontal_Sup_Medial_R | 88.27             | 3.05  | 316  |
| Limbic         |                 | Cingulate_Ant_L      | 86.73             | 3.07  | 680  |
| Frontal        |                 | Frontal_Sup_Medial_L | 79.5              | 2.6   | 384  |
| Frontal        |                 | Frontal_Inf_Orb_2_L  | 75.33             | 1.84  | 113  |
| Frontal        |                 | Frontal_Sup_2_L      | 65.96             | 3.04  | 595  |
| Frontal        |                 | Frontal_Inf_Tri_L    | 65.15             | 2.21  | 501  |
| Frontal        |                 | Frontal_Mid_2_L      | 63.87             | 2.68  | 960  |
| Frontal        |                 | Frontal_Mid_2_R      | 61.58             | 2.64  | 1077 |
| Frontal        |                 | Frontal_Sup_2_R      | 54.5              | 3.34  | 594  |
| Frontal        |                 | Frontal_Inf_Tri_R    | 49.01             | 2.1   | 322  |
| Central        |                 | Frontal_Inf_Orb_2_R  | 40.4              | 2.22  | 40   |
| <b>iCAP 13</b> |                 | Posterior Fossa      | Cerebelum_Crus2_R | 87.19 | 3.47 |

|                 |                   |       |      |     |
|-----------------|-------------------|-------|------|-----|
| Posterior Fossa | Cerebelum_Crus2_L | 86.06 | 3.58 | 685 |
| Posterior Fossa | Vermis_8          | 84.93 | 2.74 | 124 |
| Occipital       | Occipital_Inf_R   | 79.28 | 2.27 | 176 |
| Posterior Fossa | Cerebelum_8_L     | 67.19 | 2.09 | 43  |
| Posterior Fossa | Cerebelum_8_R     | 66.25 | 2.03 | 53  |
| Occipital       | Occipital_Inf_L   | 63.31 | 2.25 | 157 |
| Posterior Fossa | Cerebelum_7b_R    | 63.04 | 2.22 | 29  |
| Posterior Fossa | Vermis_7          | 53.28 | 2.02 | 73  |
| Posterior Fossa | Cerebelum_7b_L    | 53.26 | 2.77 | 49  |
| Posterior Fossa | Cerebelum_Crus1_R | 52.28 | 2.94 | 781 |
| Posterior Fossa | Cerebelum_Crus1_L | 51.99 | 2.83 | 798 |
| Posterior Fossa | Vermis_9          | 38.71 | 2.17 | 36  |
| Temporal        | Temporal_Inf_R    | 27.95 | 1.85 | 317 |
| Posterior Fossa | Cerebelum_9_L     | 27.27 | 1.86 | 15  |
| Posterior Fossa | Cerebelum_9_R     | 24.14 | 2.09 | 14  |
| Occipital       | Lingual_R         | 20.2  | 2.57 | 198 |
| Posterior Fossa | Vermis_6          | 18.73 | 1.99 | 50  |
| Occipital       | Calcarine_L       | 17.72 | 2.14 | 194 |
| Temporal        | Temporal_Inf_L    | 17.16 | 1.8  | 144 |
| Occipital       | Occipital_Mid_L   | 13.9  | 1.89 | 154 |
| Occipital       | Fusiform_L        | 12.97 | 2.06 | 154 |
| Occipital       | Lingual_L         | 12.11 | 2.71 | 119 |

---



**Table S1.a.** Dice coefficient of similarity between the 13 icaps retrieved and the Yeo's 17 cortical resting-state network.<sup>45</sup>

|                                                                   | N1:<br>VisCent | N2:<br>VisPeri | N3:<br>SomMotA | N4:<br>SomMotB | N5:<br>DorsAttnA | N6:<br>DorsAttnB | N7:<br>SalVentAttnA | N8:<br>SalVentAttnB | N9:<br>LimbicB | N10:<br>LimbicA | N11:<br>ContA | N12:<br>ContB | N13:<br>ContC | N14:<br>DefaultA | N15:<br>DefaultB | N16:<br>DefaultC | N17:<br>TempPar | N1:<br>VisCent |
|-------------------------------------------------------------------|----------------|----------------|----------------|----------------|------------------|------------------|---------------------|---------------------|----------------|-----------------|---------------|---------------|---------------|------------------|------------------|------------------|-----------------|----------------|
| icap 1 - precuneus/posterior default mode network (DMN)           | 0.003          | 0.007          | 0.000          | 0.000          | 0.152            | 0.013            | 0.000               | 0.000               | 0.000          | 0.000           | 0.050         | 0.042         | 0.003         | 0.000            | 0.004            | 0.002            | 0.000           | 0.003          |
| icap 2 - sensorimotor/auditory (AUD)                              | 0.000          | 0.000          | 0.066          | 0.161          | 0.000            | 0.100            | 0.157               | 0.018               | 0.000          | 0.000           | 0.000         | 0.005         | 0.001         | 0.004            | 0.000            | 0.000            | 0.000           | 0.000          |
| icap 3 - anterior cerebellum/vermis                               | 0.011          | 0.032          | 0.000          | 0.000          | 0.003            | 0.000            | 0.000               | 0.000               | 0.000          | 0.000           | 0.000         | 0.000         | 0.000         | 0.000            | 0.004            | 0.000            | 0.000           | 0.011          |
| icap 4 - frontoparietal > Dorsal Attention                        | 0.000          | 0.001          | 0.203          | 0.000          | 0.149            | 0.220            | 0.016               | 0.006               | 0.000          | 0.000           | 0.023         | 0.105         | 0.020         | 0.001            | 0.001            | 0.007            | 0.002           | 0.000          |
| icap 5- posterior default mode network (pDMN) > executive control | 0.000          | 0.000          | 0.001          | 0.000          | 0.021            | 0.004            | 0.005               | 0.008               | 0.000          | 0.000           | 0.204         | 0.096         | 0.085         | 0.000            | 0.000            | 0.193            | 0.025           | 0.000          |
| icap 6- posterior cerebellum                                      | 0.108          | 0.001          | 0.000          | 0.000          | 0.006            | 0.000            | 0.000               | 0.000               | 0.000          | 0.000           | 0.000         | 0.000         | 0.000         | 0.000            | 0.000            | 0.000            | 0.000           | 0.108          |
| icap 7- frontotemporal right                                      | 0.000          | 0.000          | 0.003          | 0.047          | 0.002            | 0.036            | 0.086               | 0.177               | 0.000          | 0.000           | 0.002         | 0.120         | 0.125         | 0.051            | 0.000            | 0.008            | 0.034           | 0.000          |
| icap 8 - anterior insula/amygdala                                 | 0.000          | 0.000          | 0.006          | 0.290          | 0.000            | 0.000            | 0.205               | 0.093               | 0.003          | 0.000           | 0.000         | 0.001         | 0.001         | 0.043            | 0.000            | 0.001            | 0.035           | 0.000          |
| icap 9 - frontotemporal left                                      | 0.000          | 0.000          | 0.004          | 0.090          | 0.000            | 0.039            | 0.057               | 0.116               | 0.002          | 0.000           | 0.000         | 0.123         | 0.059         | 0.130            | 0.000            | 0.014            | 0.147           | 0.000          |
| icap 10 - secondary visual                                        | 0.153          | 0.012          | 0.000          | 0.000          | 0.188            | 0.034            | 0.005               | 0.001               | 0.000          | 0.000           | 0.000         | 0.007         | 0.000         | 0.098            | 0.069            | 0.032            | 0.009           | 0.153          |
| icap 11 - primary visual > Visual Peripheric                      | 0.037          | 0.375          | 0.000          | 0.000          | 0.009            | 0.000            | 0.000               | 0.000               | 0.000          | 0.000           | 0.154         | 0.000         | 0.000         | 0.000            | 0.090            | 0.045            | 0.000           | 0.037          |
| icap 12 - frontal                                                 | 0.000          | 0.000          | 0.000          | 0.000          | 0.000            | 0.000            | 0.000               | 0.255               | 0.000          | 0.002           | 0.000         | 0.079         | 0.031         | 0.001            | 0.000            | 0.125            | 0.056           | 0.000          |
| icap 13 - cerebellum/visual                                       | 0.116          | 0.000          | 0.000          | 0.000          | 0.019            | 0.000            | 0.000               | 0.000               | 0.000          | 0.000           | 0.000         | 0.006         | 0.000         | 0.000            | 0.000            | 0.001            | 0.000           | 0.116          |

Note: The Network parcellation of the Yeo's 17 networks include the following regions: N1: VisCent-Visual A; N2: VisPeri-Visual B; N3: SomMotA-Somatomotor A; N4: SomMotB-Somatomotor B; N5: DorsAttnA-Dorsal Attention A; N6: DorsAttnB-Dorsal Attention B; N7: SalVentAttnA-Saliency/Ventral Attention A; N8: SalVentAttnB-

*Saliency/Ventral Attention B; N9: LimbicB-Limbic B; N10: LimbicA-Limbic A; N11: ContA-Control A; N12: ContB-Control B; N13: ContC-Control C; N14: DefaultA-Default A; N15: DefaultB-Default B; N16: DefaultC-Default C; and N17: TempPar-Temporal Parietal.*

**Table S2.** Group comparison for the VPT and full-term control groups for the occurrence of the identified iCAPs networks using a general linear model including socio-economic status (based on the Largo score) and sex as covariate.

| iCAPs – Occurrence | VPT group |       | Full-term group |       | General linear models (including socio-economic status and sex as covariate) |         |               |
|--------------------|-----------|-------|-----------------|-------|------------------------------------------------------------------------------|---------|---------------|
|                    | Mean      | SD    | Mean            | SD    | F                                                                            | p-value | q-value (FDR) |
| iCAP 1             | 34.679    | 5.863 | 34.333          | 3.774 | F (1,36) = 0.029                                                             | 0.865   | 0.937         |
| iCAP 2             | 28.179    | 6.301 | 28.583          | 4.814 | F (1,36) =3.236                                                              | 0.080   | 0.523         |
| iCAP 3             | 24.179    | 6.037 | 24.583          | 7.879 | F (1,36) =0.571                                                              | 0.455   | 0.845         |
| iCAP 4             | 17.286    | 3.670 | 17.333          | 4.559 | F (1,36) =0.003                                                              | 0.985   | 0.985         |
| iCAP 5             | 20.357    | 6.442 | 24.083          | 6.288 | F (1,36) =6.333                                                              | 0.016   | 0.214         |
| iCAP 6             | 23.321    | 6.481 | 24.750          | 4.159 | F (1,36) =1.353                                                              | 0.252   | 0.671         |
| iCAP 7             | 17.393    | 4.856 | 17.000          | 5.908 | F (1,36) =0.094                                                              | 0.761   | 0.899         |
| iCAP 8             | 14.893    | 5.370 | 13.333          | 5.483 | F (1,36) =0.175                                                              | 0.678   | 0.899         |
| iCAP 9             | 20.214    | 5.776 | 21.667          | 5.416 | F (1,36) =0.812                                                              | 0.373   | 0.809         |
| iCAP 10            | 17.000    | 5.185 | 17.917          | 5.485 | F (1,36) =1.32                                                               | 0.258   | 0.671         |
| iCAP 11            | 8.750     | 4.070 | 8.167           | 5.167 | F (1,36) =0.267                                                              | 0.609   | 0.899         |
| iCAP 12            | 9.250     | 4.291 | 7.500           | 5.018 | F (1,36) =2.211                                                              | 0.146   | 0.631         |
| iCAP 13            | 4.500     | 2.975 | 3.917           | 1.505 | F (1,36) =0.097                                                              | 0.757   | 0.899         |

**Table S3.** Group comparison for the VPT and full-term control groups for the total duration of the identified iCAPs networks using a general linear model including socio-economic status (based on the Largo score) and sex as covariate.

| iCAPs – Total duration | VPT group |        | Full-term group |       | General linear models (including socio-economic status and sex as covariate) |         |               |
|------------------------|-----------|--------|-----------------|-------|------------------------------------------------------------------------------|---------|---------------|
|                        | Mean      | SD     | Mean            | SD    | F                                                                            | p-value | q-value (FDR) |
| iCAP 1                 | 44.477    | 8.636  | 49.705          | 8.020 | F (1,36) = 3.491                                                             | 0.070   | 0.316         |
| iCAP 2                 | 32.072    | 9.216  | 33.036          | 7.019 | F (1,36) = 0.545                                                             | 0.465   | 0.609         |
| iCAP 3                 | 21.889    | 5.857  | 20.643          | 5.536 | F (1,36) = 0.046                                                             | 0.831   | 0.831         |
| iCAP 4                 | 19.855    | 4.991  | 17.964          | 6.581 | F (1,36) = 1.558                                                             | 0.220   | 0.609         |
| iCAP 5                 | 24.793    | 10.264 | 29.196          | 8.310 | F (1,36) = 3.411                                                             | 0.073   | 0.316         |
| iCAP 6                 | 23.950    | 7.687  | 26.015          | 5.529 | F (1,36) = 1.218                                                             | 0.277   | 0.609         |
| iCAP 7                 | 23.661    | 6.349  | 20.995          | 6.528 | F (1,36) = 0.811                                                             | 0.374   | 0.609         |
| iCAP 8                 | 15.501    | 7.707  | 12.746          | 5.295 | F (1,36) = 0.317                                                             | 0.577   | 0.682         |
| iCAP 9                 | 23.614    | 7.244  | 27.313          | 7.637 | F (1,36) = 1.091                                                             | 0.303   | 0.609         |
| iCAP 10                | 17.618    | 6.518  | 17.781          | 5.031 | F (1,36) = 0.112                                                             | 0.740   | 0.801         |
| iCAP 11                | 10.408    | 6.744  | 9.193           | 6.657 | F (1,36) = 0.538                                                             | 0.468   | 0.609         |
| iCAP 12                | 8.360     | 4.815  | 5.876           | 3.488 | F (1,36) = 4.766                                                             | 0.036   | 0.316         |
| iCAP 13                | 4.248     | 3.084  | 3.334           | 2.205 | F (1,36) = 0.633                                                             | 0.431   | 0.609         |

**Table S4.** Group comparison for the VPT and full-term control groups for the coupling of the identified iCAPs networks using a general linear model including socio-economic status (based on the Largo score) and sex as covariate.

| Coupling       | VPT group |       | Full-term group |       | General linear models (including socio-economic status and sex as covariate) |         |               |
|----------------|-----------|-------|-----------------|-------|------------------------------------------------------------------------------|---------|---------------|
|                | Mean      | SD    | Mean            | SD    | F                                                                            | p-value | q-value (FDR) |
| iCAP1 & iCAP2  | 0.116     | 0.068 | 0.121           | 0.054 | F (1,36) = 0.023                                                             | 0.881   | 0.975         |
| iCAP1 & iCAP3  | 0.09      | 0.046 | 0.101           | 0.042 | F (1,36) = 1.068                                                             | 0.308   | 0.793         |
| iCAP1 & iCAP4  | 0.03      | 0.029 | 0.032           | 0.025 | F (1,36) = 0.597                                                             | 0.445   | 0.793         |
| iCAP1 & iCAP5  | 0.064     | 0.025 | 0.067           | 0.039 | F (1,36) = 0.005                                                             | 0.946   | 0.975         |
| iCAP1 & iCAP6  | 0.044     | 0.027 | 0.022           | 0.015 | F (1,36) = 4.669                                                             | 0.037   | 0.372         |
| iCAP1 & iCAP7  | 0.163     | 0.076 | 0.147           | 0.053 | F (1,36) = 0.005                                                             | 0.946   | 0.975         |
| iCAP1 & iCAP8  | 0.075     | 0.046 | 0.065           | 0.04  | F (1,36) = 0.099                                                             | 0.754   | 0.925         |
| iCAP1 & iCAP9  | 0.156     | 0.048 | 0.148           | 0.068 | F (1,36) = 0.469                                                             | 0.498   | 0.793         |
| iCAP1 & iCAP10 | 0.071     | 0.042 | 0.039           | 0.025 | F (1,36) = 10.757                                                            | 0.002   | 0.090         |
| iCAP1 & iCAP11 | 0.05      | 0.048 | 0.05            | 0.042 | F (1,36) = 0.07                                                              | 0.792   | 0.951         |
| iCAP1 & iCAP12 | 0.064     | 0.05  | 0.049           | 0.026 | F (1,36) = 1.737                                                             | 0.196   | 0.793         |
| iCAP1 & iCAP13 | 0.042     | 0.044 | 0.05            | 0.036 | F (1,36) = 0.054                                                             | 0.818   | 0.967         |
| iCAP2 & iCAP3  | 0.101     | 0.059 | 0.103           | 0.054 | F (1,36) = 0.107                                                             | 0.745   | 0.925         |
| iCAP2 & iCAP4  | 0.116     | 0.068 | 0.121           | 0.054 | F (1,36) = 0.964                                                             | 0.333   | 0.793         |
| iCAP2 & iCAP5  | 0.09      | 0.046 | 0.101           | 0.042 | F (1,36) = 0.039                                                             | 0.845   | 0.969         |
| iCAP2 & iCAP6  | 0.03      | 0.029 | 0.032           | 0.025 | F (1,36) = 0.381                                                             | 0.541   | 0.796         |
| iCAP2 & iCAP7  | 0.064     | 0.025 | 0.067           | 0.039 | F (1,36) = 0.357                                                             | 0.554   | 0.797         |
| iCAP2 & iCAP8  | 0.044     | 0.027 | 0.022           | 0.015 | F (1,36) = 0.933                                                             | 0.341   | 0.793         |
| iCAP2 & iCAP9  | 0.163     | 0.076 | 0.147           | 0.053 | F (1,36) = 0.343                                                             | 0.562   | 0.797         |
| iCAP2 & iCAP10 | 0.075     | 0.046 | 0.065           | 0.04  | F (1,36) = 0.746                                                             | 0.394   | 0.793         |
| iCAP2 & iCAP11 | 0.156     | 0.048 | 0.148           | 0.068 | F (1,36) = 1.555                                                             | 0.220   | 0.793         |
| iCAP2 & iCAP12 | 0.071     | 0.042 | 0.039           | 0.025 | F (1,36) = 5.352                                                             | 0.027   | 0.345         |
| iCAP2 & iCAP13 | 0.05      | 0.048 | 0.05            | 0.042 | F (1,36) = 9.754                                                             | 0.004   | 0.092         |
| iCAP3 & iCAP4  | 0.064     | 0.05  | 0.049           | 0.026 | F (1,36) = 2.574                                                             | 0.117   | 0.704         |

|                |       |       |       |       |                  |       |       |
|----------------|-------|-------|-------|-------|------------------|-------|-------|
| iCAP3 & iCAP5  | 0.042 | 0.044 | 0.05  | 0.036 | F (1,36) = 1.892 | 0.177 | 0.793 |
| iCAP3 & iCAP6  | 0.101 | 0.059 | 0.103 | 0.054 | F (1,36) = 0.952 | 0.336 | 0.793 |
| iCAP3 & iCAP7  | 0.116 | 0.068 | 0.121 | 0.054 | F (1,36) = 0     | 0.999 | 0.999 |
| iCAP3 & iCAP8  | 0.09  | 0.046 | 0.101 | 0.042 | F (1,36) = 0.174 | 0.679 | 0.898 |
| iCAP3 & iCAP9  | 0.03  | 0.029 | 0.032 | 0.025 | F (1,36) = 0.578 | 0.452 | 0.793 |
| iCAP3 & iCAP10 | 0.064 | 0.025 | 0.067 | 0.039 | F (1,36) = 0.01  | 0.920 | 0.975 |
| iCAP3 & iCAP11 | 0.044 | 0.027 | 0.022 | 0.015 | F (1,36) = 0.006 | 0.940 | 0.975 |
| iCAP3 & iCAP12 | 0.163 | 0.076 | 0.147 | 0.053 | F (1,36) = 8.109 | 0.007 | 0.141 |
| iCAP3 & iCAP13 | 0.075 | 0.046 | 0.065 | 0.04  | F (1,36) = 0.768 | 0.387 | 0.793 |
| iCAP4 & iCAP5  | 0.156 | 0.048 | 0.148 | 0.068 | F (1,36) = 0.263 | 0.611 | 0.851 |
| iCAP4 & iCAP6  | 0.071 | 0.042 | 0.039 | 0.025 | F (1,36) = 0.437 | 0.513 | 0.793 |
| iCAP4 & iCAP7  | 0.05  | 0.048 | 0.05  | 0.042 | F (1,36) = 4.62  | 0.038 | 0.372 |
| iCAP4 & iCAP8  | 0.064 | 0.05  | 0.049 | 0.026 | F (1,36) = 1.624 | 0.211 | 0.793 |
| iCAP4 & iCAP9  | 0.042 | 0.044 | 0.05  | 0.036 | F (1,36) = 0.688 | 0.412 | 0.793 |
| iCAP4 & iCAP10 | 0.101 | 0.059 | 0.103 | 0.054 | F (1,36) = 0.701 | 0.408 | 0.793 |
| iCAP4 & iCAP11 | 0.116 | 0.068 | 0.121 | 0.054 | F (1,36) = 0.216 | 0.645 | 0.881 |
| iCAP4 & iCAP12 | 0.09  | 0.046 | 0.101 | 0.042 | F (1,36) = 1.189 | 0.283 | 0.793 |
| iCAP4 & iCAP13 | 0.03  | 0.029 | 0.032 | 0.025 | F (1,36) = 1.484 | 0.231 | 0.793 |
| iCAP5 & iCAP6  | 0.064 | 0.025 | 0.067 | 0.039 | F (1,36) = 2.121 | 0.154 | 0.793 |
| iCAP5 & iCAP7  | 0.044 | 0.027 | 0.022 | 0.015 | F (1,36) = 2.912 | 0.097 | 0.627 |
| iCAP5 & iCAP8  | 0.163 | 0.076 | 0.147 | 0.053 | F (1,36) = 0.447 | 0.508 | 0.793 |
| iCAP5 & iCAP9  | 0.075 | 0.046 | 0.065 | 0.04  | F (1,36) = 0.405 | 0.528 | 0.793 |
| iCAP5 & iCAP10 | 0.156 | 0.048 | 0.148 | 0.068 | F (1,36) = 1.683 | 0.203 | 0.793 |
| iCAP5 & iCAP11 | 0.071 | 0.042 | 0.039 | 0.025 | F (1,36) = 0.621 | 0.436 | 0.793 |
| iCAP5 & iCAP12 | 0.05  | 0.048 | 0.05  | 0.042 | F (1,36) = 0.001 | 0.975 | 0.988 |
| iCAP5 & iCAP13 | 0.064 | 0.05  | 0.049 | 0.026 | F (1,36) = 1.128 | 0.295 | 0.793 |
| iCAP6 & iCAP7  | 0.042 | 0.044 | 0.05  | 0.036 | F (1,36) = 1.635 | 0.209 | 0.793 |
| iCAP6 & iCAP8  | 0.101 | 0.059 | 0.103 | 0.054 | F (1,36) = 0.118 | 0.733 | 0.925 |
| iCAP6 & iCAP9  | 0.116 | 0.068 | 0.121 | 0.054 | F (1,36) = 0.203 | 0.655 | 0.881 |

|                 |       |       |       |       |                   |       |       |
|-----------------|-------|-------|-------|-------|-------------------|-------|-------|
| iCAP6 & iCAP10  | 0.09  | 0.046 | 0.101 | 0.042 | F (1,36) = 14.641 | 0.000 | 0.039 |
| iCAP6 & iCAP11  | 0.03  | 0.029 | 0.032 | 0.025 | F (1,36) = 5.724  | 0.022 | 0.344 |
| iCAP6 & iCAP12  | 0.064 | 0.025 | 0.067 | 0.039 | F (1,36) = 2.278  | 0.140 | 0.780 |
| iCAP6 & iCAP13  | 0.044 | 0.027 | 0.022 | 0.015 | F (1,36) = 0.774  | 0.385 | 0.793 |
| iCAP7 & iCAP8   | 0.163 | 0.076 | 0.147 | 0.053 | F (1,36) = 0.426  | 0.518 | 0.793 |
| iCAP7 & iCAP9   | 0.075 | 0.046 | 0.065 | 0.04  | F (1,36) = 0.012  | 0.915 | 0.975 |
| iCAP7 & iCAP10  | 0.156 | 0.048 | 0.148 | 0.068 | F (1,36) = 0.63   | 0.432 | 0.793 |
| iCAP7 & iCAP11  | 0.071 | 0.042 | 0.039 | 0.025 | F (1,36) = 1.296  | 0.262 | 0.793 |
| iCAP7 & iCAP12  | 0.05  | 0.048 | 0.05  | 0.042 | F (1,36) = 0.565  | 0.457 | 0.793 |
| iCAP7 & iCAP13  | 0.064 | 0.05  | 0.049 | 0.026 | F (1,36) = 0.096  | 0.759 | 0.925 |
| iCAP8 & iCAP9   | 0.042 | 0.044 | 0.05  | 0.036 | F (1,36) = 0.04   | 0.843 | 0.969 |
| iCAP8 & iCAP10  | 0.101 | 0.059 | 0.103 | 0.054 | F (1,36) = 4.406  | 0.043 | 0.372 |
| iCAP8 & iCAP11  | 0.116 | 0.068 | 0.121 | 0.054 | F (1,36) = 0.012  | 0.914 | 0.975 |
| iCAP8 & iCAP12  | 0.09  | 0.046 | 0.101 | 0.042 | F (1,36) = 0.681  | 0.415 | 0.793 |
| iCAP8 & iCAP13  | 0.03  | 0.029 | 0.032 | 0.025 | F (1,36) = 0.797  | 0.378 | 0.793 |
| iCAP9 & iCAP10  | 0.064 | 0.025 | 0.067 | 0.039 | F (1,36) = 0.69   | 0.412 | 0.793 |
| iCAP9 & iCAP11  | 0.044 | 0.027 | 0.022 | 0.015 | F (1,36) = 1.241  | 0.273 | 0.793 |
| iCAP9 & iCAP12  | 0.163 | 0.076 | 0.147 | 0.053 | F (1,36) = 3.898  | 0.056 | 0.437 |
| iCAP9 & iCAP13  | 0.075 | 0.046 | 0.065 | 0.04  | F (1,36) = 0.004  | 0.950 | 0.975 |
| iCAP10 & iCAP11 | 0.156 | 0.048 | 0.148 | 0.068 | F (1,36) = 0.51   | 0.480 | 0.793 |
| iCAP10 & iCAP12 | 0.071 | 0.042 | 0.039 | 0.025 | F (1,36) = 0.484  | 0.491 | 0.793 |
| iCAP10 & iCAP13 | 0.05  | 0.048 | 0.05  | 0.042 | F (1,36) = 3.041  | 0.090 | 0.627 |
| iCAP11 & iCAP12 | 0.064 | 0.05  | 0.049 | 0.026 | F (1,36) = 0.484  | 0.491 | 0.793 |
| iCAP11 & iCAP13 | 0.042 | 0.044 | 0.05  | 0.036 | F (1,36) = 1.436  | 0.239 | 0.793 |
| iCAP12 & iCAP13 | 0.101 | 0.059 | 0.103 | 0.054 | F (1,36) = 0.135  | 0.716 | 0.925 |

**Table S5.** Group comparison for the VPT and full-term control groups for the anti-coupling of the identified iCAPs networks using a general linear model including socio-economic status (based on the Largo score) and sex as covariate.

| Anti-coupling  | VPT group |       | Full-term group |       | General linear models (including socio-economic status and sex as covariate) |         |               |
|----------------|-----------|-------|-----------------|-------|------------------------------------------------------------------------------|---------|---------------|
|                | Mean      | SD    | Mean            | SD    | F                                                                            | p-value | q-value (FDR) |
| iCAP1 & iCAP2  | 0.161     | 0.069 | 0.155           | 0.068 | F (1,36) = 0.313                                                             | 0.579   | 0.869         |
| iCAP1 & iCAP3  | 0.118     | 0.041 | 0.124           | 0.065 | F (1,36) = 0.00005                                                           | 0.994   | 0.995         |
| iCAP1 & iCAP4  | 0.236     | 0.071 | 0.215           | 0.117 | F (1,36) = 0.668                                                             | 0.419   | 0.743         |
| iCAP1 & iCAP5  | 0.176     | 0.086 | 0.200           | 0.063 | F (1,36) = 1.374                                                             | 0.249   | 0.740         |
| iCAP1 & iCAP6  | 0.239     | 0.081 | 0.305           | 0.090 | F (1,36) = 4.832                                                             | 0.034   | 0.526         |
| iCAP1 & iCAP7  | 0.078     | 0.066 | 0.063           | 0.037 | F (1,36) = 2.521                                                             | 0.121   | 0.647         |
| iCAP1 & iCAP8  | 0.084     | 0.048 | 0.083           | 0.047 | F (1,36) = 0.008                                                             | 0.928   | 0.995         |
| iCAP1 & iCAP9  | 0.075     | 0.044 | 0.087           | 0.041 | F (1,36) = 0.003                                                             | 0.959   | 0.995         |
| iCAP1 & iCAP10 | 0.117     | 0.071 | 0.162           | 0.059 | F (1,36) = 4.789                                                             | 0.035   | 0.526         |
| iCAP1 & iCAP11 | 0.081     | 0.067 | 0.062           | 0.046 | F (1,36) = 2.096                                                             | 0.156   | 0.647         |
| iCAP1 & iCAP12 | 0.040     | 0.038 | 0.027           | 0.027 | F (1,36) = 1.921                                                             | 0.174   | 0.647         |
| iCAP1 & iCAP13 | 0.020     | 0.023 | 0.010           | 0.015 | F (1,36) = 1.984                                                             | 0.168   | 0.647         |
| iCAP2 & iCAP3  | 0.111     | 0.052 | 0.121           | 0.100 | F (1,36) = 0.0001                                                            | 0.990   | 0.995         |
| iCAP2 & iCAP4  | 0.161     | 0.069 | 0.155           | 0.068 | F (1,36) = 4.389                                                             | 0.043   | 0.526         |
| iCAP2 & iCAP5  | 0.118     | 0.041 | 0.124           | 0.065 | F (1,36) = 0.131                                                             | 0.719   | 0.985         |
| iCAP2 & iCAP6  | 0.236     | 0.071 | 0.215           | 0.117 | F (1,36) = 1.089                                                             | 0.304   | 0.740         |
| iCAP2 & iCAP7  | 0.176     | 0.086 | 0.200           | 0.063 | F (1,36) = 0.014                                                             | 0.905   | 0.995         |
| iCAP2 & iCAP8  | 0.239     | 0.081 | 0.305           | 0.090 | F (1,36) = 4.182                                                             | 0.048   | 0.526         |
| iCAP2 & iCAP9  | 0.078     | 0.066 | 0.063           | 0.037 | F (1,36) = 0.188                                                             | 0.667   | 0.941         |
| iCAP2 & iCAP10 | 0.084     | 0.048 | 0.083           | 0.047 | F (1,36) = 2.527                                                             | 0.121   | 0.647         |
| iCAP2 & iCAP11 | 0.075     | 0.044 | 0.087           | 0.041 | F (1,36) = 0.001                                                             | 0.976   | 0.995         |
| iCAP2 & iCAP12 | 0.117     | 0.071 | 0.162           | 0.059 | F (1,36) = 0.705                                                             | 0.407   | 0.743         |
| iCAP2 & iCAP13 | 0.081     | 0.067 | 0.062           | 0.046 | F (1,36) = 1.156                                                             | 0.289   | 0.740         |



|                |       |       |       |       |                  |       |       |
|----------------|-------|-------|-------|-------|------------------|-------|-------|
| iCAP3 & iCAP4  | 0.040 | 0.038 | 0.027 | 0.027 | F (1,36) = 0.034 | 0.854 | 0.995 |
| iCAP3 & iCAP5  | 0.020 | 0.023 | 0.010 | 0.015 | F (1,36) = 0.693 | 0.411 | 0.743 |
| iCAP3 & iCAP6  | 0.111 | 0.052 | 0.121 | 0.100 | F (1,36) = 0.775 | 0.384 | 0.743 |
| iCAP3 & iCAP7  | 0.161 | 0.069 | 0.155 | 0.068 | F (1,36) = 0.705 | 0.407 | 0.743 |
| iCAP3 & iCAP8  | 0.118 | 0.041 | 0.124 | 0.065 | F (1,36) = 0.034 | 0.855 | 0.995 |
| iCAP3 & iCAP9  | 0.236 | 0.071 | 0.215 | 0.117 | F (1,36) = 0.179 | 0.675 | 0.941 |
| iCAP3 & iCAP10 | 0.176 | 0.086 | 0.200 | 0.063 | F (1,36) = 0.001 | 0.970 | 0.995 |
| iCAP3 & iCAP11 | 0.239 | 0.081 | 0.305 | 0.090 | F (1,36) = 1.097 | 0.302 | 0.740 |
| iCAP3 & iCAP12 | 0.078 | 0.066 | 0.063 | 0.037 | F (1,36) = 0.075 | 0.786 | 0.995 |
| iCAP3 & iCAP13 | 0.084 | 0.048 | 0.083 | 0.047 | F (1,36) = 0.936 | 0.340 | 0.743 |
| iCAP4 & iCAP5  | 0.075 | 0.044 | 0.087 | 0.041 | F (1,36) = 0.001 | 0.970 | 0.995 |
| iCAP4 & iCAP6  | 0.117 | 0.071 | 0.162 | 0.059 | F (1,36) = 2.713 | 0.108 | 0.647 |
| iCAP4 & iCAP7  | 0.081 | 0.067 | 0.062 | 0.046 | F (1,36) = 0.043 | 0.837 | 0.995 |
| iCAP4 & iCAP8  | 0.040 | 0.038 | 0.027 | 0.027 | F (1,36) = 0.762 | 0.388 | 0.743 |
| iCAP4 & iCAP9  | 0.020 | 0.023 | 0.010 | 0.015 | F (1,36) = 0.53  | 0.471 | 0.799 |
| iCAP4 & iCAP10 | 0.111 | 0.052 | 0.121 | 0.100 | F (1,36) = 1.494 | 0.230 | 0.740 |
| iCAP4 & iCAP11 | 0.161 | 0.069 | 0.155 | 0.068 | F (1,36) = 1.222 | 0.276 | 0.740 |
| iCAP4 & iCAP12 | 0.118 | 0.041 | 0.124 | 0.065 | F (1,36) = 0.984 | 0.328 | 0.743 |
| iCAP4 & iCAP13 | 0.236 | 0.071 | 0.215 | 0.117 | F (1,36) = 1.149 | 0.291 | 0.740 |
| iCAP5 & iCAP6  | 0.176 | 0.086 | 0.200 | 0.063 | F (1,36) = 2.107 | 0.155 | 0.647 |
| iCAP5 & iCAP7  | 0.239 | 0.081 | 0.305 | 0.090 | F (1,36) = 2.448 | 0.126 | 0.647 |
| iCAP5 & iCAP8  | 0.078 | 0.066 | 0.063 | 0.037 | F (1,36) = 1.382 | 0.247 | 0.740 |
| iCAP5 & iCAP9  | 0.084 | 0.048 | 0.083 | 0.047 | F (1,36) = 3.554 | 0.067 | 0.526 |
| iCAP5 & iCAP10 | 0.075 | 0.044 | 0.087 | 0.041 | F (1,36) = 0.321 | 0.574 | 0.869 |
| iCAP5 & iCAP11 | 0.117 | 0.071 | 0.162 | 0.059 | F (1,36) = 0.083 | 0.775 | 0.995 |
| iCAP5 & iCAP12 | 0.081 | 0.067 | 0.062 | 0.046 | F (1,36) = 0.763 | 0.388 | 0.743 |
| iCAP5 & iCAP13 | 0.040 | 0.038 | 0.027 | 0.027 | F (1,36) = 8.242 | 0.007 | 0.292 |
| iCAP6 & iCAP7  | 0.020 | 0.023 | 0.010 | 0.015 | F (1,36) = 0.446 | 0.508 | 0.826 |
| iCAP6 & iCAP8  | 0.111 | 0.052 | 0.121 | 0.100 | F (1,36) = 0.97  | 0.331 | 0.743 |

|                 |       |       |       |       |                    |       |       |
|-----------------|-------|-------|-------|-------|--------------------|-------|-------|
| iCAP6 & iCAP9   | 0.161 | 0.069 | 0.155 | 0.068 | F (1,36) = 3.342   | 0.076 | 0.538 |
| iCAP6 & iCAP10  | 0.118 | 0.041 | 0.124 | 0.065 | F (1,36) = 8.034   | 0.007 | 0.292 |
| iCAP6 & iCAP11  | 0.236 | 0.071 | 0.215 | 0.117 | F (1,36) = 0.099   | 0.755 | 0.995 |
| iCAP6 & iCAP12  | 0.176 | 0.086 | 0.200 | 0.063 | F (1,36) = 0.783   | 0.382 | 0.743 |
| iCAP6 & iCAP13  | 0.239 | 0.081 | 0.305 | 0.090 | F (1,36) = 0.294   | 0.591 | 0.870 |
| iCAP7 & iCAP8   | 0.078 | 0.066 | 0.063 | 0.037 | F (1,36) = 0.487   | 0.490 | 0.813 |
| iCAP7 & iCAP9   | 0.084 | 0.048 | 0.083 | 0.047 | F (1,36) = 1.606   | 0.213 | 0.740 |
| iCAP7 & iCAP10  | 0.075 | 0.044 | 0.087 | 0.041 | F (1,36) = 0.00004 | 0.995 | 0.995 |
| iCAP7 & iCAP11  | 0.117 | 0.071 | 0.162 | 0.059 | F (1,36) = 2.071   | 0.159 | 0.647 |
| iCAP7 & iCAP12  | 0.081 | 0.067 | 0.062 | 0.046 | F (1,36) = 3.925   | 0.055 | 0.526 |
| iCAP7 & iCAP13  | 0.040 | 0.038 | 0.027 | 0.027 | F (1,36) = 0.036   | 0.851 | 0.995 |
| iCAP8 & iCAP9   | 0.020 | 0.023 | 0.010 | 0.015 | F (1,36) = 0.599   | 0.444 | 0.770 |
| iCAP8 & iCAP10  | 0.111 | 0.052 | 0.121 | 0.100 | F (1,36) = 0.085   | 0.772 | 0.995 |
| iCAP8 & iCAP11  | 0.161 | 0.069 | 0.155 | 0.068 | F (1,36) = 1.304   | 0.261 | 0.740 |
| iCAP8 & iCAP12  | 0.118 | 0.041 | 0.124 | 0.065 | F (1,36) = 1.982   | 0.168 | 0.647 |
| iCAP8 & iCAP13  | 0.236 | 0.071 | 0.215 | 0.117 | F (1,36) = 0.178   | 0.675 | 0.941 |
| iCAP9 & iCAP10  | 0.176 | 0.086 | 0.200 | 0.063 | F (1,36) = 1.229   | 0.275 | 0.740 |
| iCAP9 & iCAP11  | 0.239 | 0.081 | 0.305 | 0.090 | F (1,36) = 0.015   | 0.902 | 0.995 |
| iCAP9 & iCAP12  | 0.078 | 0.066 | 0.063 | 0.037 | F (1,36) = 3.648   | 0.064 | 0.526 |
| iCAP9 & iCAP13  | 0.084 | 0.048 | 0.083 | 0.047 | F (1,36) = 0.003   | 0.958 | 0.995 |
| iCAP10 & iCAP11 | 0.075 | 0.044 | 0.087 | 0.041 | F (1,36) = 0.009   | 0.924 | 0.995 |
| iCAP10 & iCAP12 | 0.117 | 0.071 | 0.162 | 0.059 | F (1,36) = 6.647   | 0.014 | 0.368 |
| iCAP10 & iCAP13 | 0.081 | 0.067 | 0.062 | 0.046 | F (1,36) = 0.361   | 0.552 | 0.861 |
| iCAP11 & iCAP12 | 0.040 | 0.038 | 0.027 | 0.027 | F (1,36) = 0.403   | 0.530 | 0.843 |
| iCAP11 & iCAP13 | 0.020 | 0.023 | 0.010 | 0.015 | F (1,36) = 0.755   | 0.391 | 0.743 |
| iCAP12 & iCAP13 | 0.111 | 0.052 | 0.121 | 0.100 | F (1,36) = 0.06    | 0.809 | 0.995 |

**Table S6.** Group comparison for the VPT and full-term control groups for the Amplitude-Laterality Index (A-LI) of the identified iCAPs networks using a general linear model including hand preference, socio-economic status (based on the Largo score) and sex as covariates.

| Amplitude-LI | VPT group |       | Full-term group |       | General linear model including hand preference, socio-economic status and sex as covariates |         |               |
|--------------|-----------|-------|-----------------|-------|---------------------------------------------------------------------------------------------|---------|---------------|
|              | Mean      | SD    | Mean            | SD    | F                                                                                           | p-value | q-value (FDR) |
| iCAP 1       | 0.027     | 0.034 | 0.030           | 0.046 | F (1,35) = 0.002                                                                            | 0.966   | 0.966         |
| iCAP 2       | 0.043     | 0.032 | 0.049           | 0.036 | F (1,35) = 0.876                                                                            | 0.356   | 0.899         |
| iCAP 3       | 0.024     | 0.056 | 0.029           | 0.061 | F (1,35) = 0.139                                                                            | 0.711   | 0.899         |
| iCAP 4       | 0.024     | 0.061 | 0.014           | 0.062 | F (1,35) = 12.659                                                                           | 0.001   | 0.014         |
| iCAP 5       | 0.009     | 0.038 | 0.008           | 0.047 | F (1,35) = 0.08                                                                             | 0.779   | 0.899         |
| iCAP 6       | 0.063     | 0.081 | 0.024           | 0.040 | F (1,35) = 0.1                                                                              | 0.754   | 0.899         |
| iCAP 7       | 0.395     | 0.124 | 0.423           | 0.098 | F (1,35) = 0.185                                                                            | 0.670   | 0.899         |
| iCAP 8       | 0.024     | 0.045 | 0.009           | 0.055 | F (1,35) = 0.047                                                                            | 0.830   | 0.899         |
| iCAP 9       | -0.393    | 0.118 | -0.390          | 0.110 | F (1,35) = 0.649                                                                            | 0.426   | 0.899         |
| iCAP 10      | 0.041     | 0.085 | 0.026           | 0.078 | F (1,35) = 0.507                                                                            | 0.481   | 0.899         |
| iCAP 11      | 0.029     | 0.047 | 0.040           | 0.049 | F (1,35) = 0.124                                                                            | 0.727   | 0.899         |
| iCAP 12      | 0.019     | 0.048 | 0.064           | 0.039 | F (1,35) = 2.479                                                                            | 0.124   | 0.808         |
| iCAP 13      | 0.030     | 0.076 | 0.022           | 0.090 | F (1,35) = 1.035                                                                            | 0.316   | 0.899         |

**Table S7.** Associations between socio-emotional outcomes and occurrence of the 13 iCAPs in the very preterm (VPT) and full-term (FT) groups based on the PLSC analysis, corresponding to Figure 1. The table shows mean saliences, bootstrap-estimated standard deviations and bootstrap ratio Z-scores for socio-emotional and iCAPs occurrence measures for the significant latent component 1.

| <b>Saliency type:<br/>Socio-emotional measures</b> | <b>Very preterm group</b>                              |                          | <b>Full-term control group</b>                         |                          |
|----------------------------------------------------|--------------------------------------------------------|--------------------------|--------------------------------------------------------|--------------------------|
|                                                    | Mean saliency (bootstrap estimated standard deviation) | Bootstrap ratio Z-scores | Mean saliency (bootstrap estimated standard deviation) | Bootstrap ratio Z-scores |
| <i>Affect recognition</i>                          | 0.05 (0.11)                                            | 0.80                     | 0.26 (0.12)                                            | 4.97                     |
| <i>Theory of mind</i>                              | -0.11 (0.15)                                           | -0.82                    | 0.14 (0.13)                                            | 4.42                     |
| <i>Internalised problems</i>                       | -0.03 (0.15)                                           | -0.47                    | -0.02 (0.12)                                           | -2.10                    |
| <i>Emotional control</i>                           | 0.35 (0.17)                                            | 2.47                     | 0.09 (0.15)                                            | -1.65                    |
| <b>Coupling duration measures</b>                  | <b>For both the very preterm and full-term groups</b>  |                          |                                                        |                          |
|                                                    | Mean saliency (bootstrap estimated standard deviation) | Bootstrap ratio Z-scores |                                                        |                          |
| <i>iCAP 1</i>                                      | 0.02 (0.1)                                             | -1.55                    |                                                        |                          |
| <i>iCAP 2</i>                                      | -0.13 (0.14)                                           | -1.37                    |                                                        |                          |
| <i>iCAP 3</i>                                      | -0.2 (0.11)                                            | -3.74                    |                                                        |                          |
| <i>iCAP 4</i>                                      | -0.18 (0.12)                                           | -2.46                    |                                                        |                          |
| <i>iCAP 5</i>                                      | -0.01 (0.12)                                           | -1.61                    |                                                        |                          |
| <i>iCAP 6</i>                                      | -0.07 (0.11)                                           | -3.20                    |                                                        |                          |
| <i>iCAP 7</i>                                      | -0.1 (0.1)                                             | -1.71                    |                                                        |                          |
| <i>iCAP 8</i>                                      | -0.07 (0.12)                                           | -2.56                    |                                                        |                          |
| <i>iCAP 9</i>                                      | -0.14 (0.1)                                            | -3.54                    |                                                        |                          |
| <i>iCAP 10</i>                                     | 0.01 (0.1)                                             | -3.28                    |                                                        |                          |
| <i>iCAP 11</i>                                     | 0.2 (0.11)                                             | 0.01                     |                                                        |                          |
| <i>iCAP 12</i>                                     | -0.14 (0.14)                                           | -2.02                    |                                                        |                          |
| <i>iCAP 13</i>                                     | 0.12 (0.12)                                            | 2.33                     |                                                        |                          |

**Table S8.** Associations between socio-emotional outcomes and coupling duration of the 13 pair of iCAPs in the very preterm (VPT) and full-term (FT) groups based on the PLSC analysis, corresponding to Figure 2. The table shows mean saliences, bootstrap-estimated standard deviations and bootstrap ratio Z-scores for socio-emotional and iCAPs coupling measures for the significant latent component 1.

| <b>Saliency type:<br/>Socio-emotional measures</b> | <b>Very preterm group</b>                              |                          | <b>Full-term control group</b>                         |                          |
|----------------------------------------------------|--------------------------------------------------------|--------------------------|--------------------------------------------------------|--------------------------|
|                                                    | Mean saliency (bootstrap estimated standard deviation) | Bootstrap ratio Z-scores | Mean saliency (bootstrap estimated standard deviation) | Bootstrap ratio Z-scores |
| <i>Affect recognition</i>                          | -0.15 (0.07)                                           | -2.63                    | -0.18 (0.07)                                           | -2.55                    |
| <i>Theory of mind</i>                              | 0.07 (0.05)                                            | 1.48                     | 0.01 (0.08)                                            | -1.14                    |
| <i>Internalised problems</i>                       | -0.3 (0.06)                                            | -5.55                    | -0.08 (0.07)                                           | -1.12                    |
| <i>Emotional control</i>                           | -0.82 (0.06)                                           | -14.07                   | -0.15 (0.08)                                           | 1.08                     |
| <b>Coupling duration measures</b>                  | <b>For both the very preterm and full-term groups</b>  |                          |                                                        |                          |
|                                                    | Mean saliency (bootstrap estimated standard deviation) | Bootstrap ratio Z-scores |                                                        |                          |
| <i>iCAP1 &amp; iCAP2</i>                           | -1.34                                                  | -0.05 (0.05)             |                                                        |                          |
| <i>iCAP1 &amp; iCAP3</i>                           | 5.54                                                   | 0.16 (0.04)              |                                                        |                          |
| <i>iCAP1 &amp; iCAP4</i>                           | 0.79                                                   | 0.04 (0.05)              |                                                        |                          |
| <i>iCAP1 &amp; iCAP5</i>                           | 0.30                                                   | 0.02 (0.06)              |                                                        |                          |
| <i>iCAP1 &amp; iCAP6</i>                           | -6.17                                                  | -0.19 (0.04)             |                                                        |                          |
| <i>iCAP1 &amp; iCAP7</i>                           | -0.19                                                  | -0.02 (0.05)             |                                                        |                          |
| <i>iCAP1 &amp; iCAP8</i>                           | -0.96                                                  | -0.01 (0.05)             |                                                        |                          |
| <i>iCAP1 &amp; iCAP9</i>                           | -1.43                                                  | -0.06 (0.04)             |                                                        |                          |
| <i>iCAP1 &amp; iCAP10</i>                          | 0.52                                                   | 0.02 (0.05)              |                                                        |                          |
| <i>iCAP1 &amp; iCAP11</i>                          | -1.02                                                  | -0.05 (0.08)             |                                                        |                          |
| <i>iCAP1 &amp; iCAP12</i>                          | -0.72                                                  | -0.04 (0.05)             |                                                        |                          |
| <i>iCAP1 &amp; iCAP13</i>                          | -2.20                                                  | -0.07 (0.04)             |                                                        |                          |
| <i>iCAP2 &amp; iCAP3</i>                           | -3.12                                                  | -0.12 (0.05)             |                                                        |                          |
| <i>iCAP2 &amp; iCAP4</i>                           | 0.23                                                   | 0.02 (0.04)              |                                                        |                          |
| <i>iCAP2 &amp; iCAP5</i>                           | 0.27                                                   | 0.03 (0.04)              |                                                        |                          |
| <i>iCAP2 &amp; iCAP6</i>                           | -0.69                                                  | -0.04 (0.06)             |                                                        |                          |
| <i>iCAP2 &amp; iCAP7</i>                           | -0.32                                                  | -0.02 (0.06)             |                                                        |                          |
| <i>iCAP2 &amp; iCAP8</i>                           | -2.15                                                  | -0.11 (0.06)             |                                                        |                          |
| <i>iCAP2 &amp; iCAP9</i>                           | -4.16                                                  | -0.16 (0.04)             |                                                        |                          |
| <i>iCAP2 &amp; iCAP10</i>                          | 0.49                                                   | 0.01 (0.05)              |                                                        |                          |
| <i>iCAP2 &amp; iCAP11</i>                          | -1.22                                                  | -0.08 (0.07)             |                                                        |                          |

|                           |       |              |
|---------------------------|-------|--------------|
| <i>iCAP2 &amp; iCAP12</i> | -3.02 | -0.15 (0.05) |
| <i>iCAP2 &amp; iCAP13</i> | -3.21 | -0.11 (0.04) |
| <i>iCAP3 &amp; iCAP4</i>  | -1.06 | -0.04 (0.06) |
| <i>iCAP3 &amp; iCAP5</i>  | -2.42 | -0.1 (0.05)  |
| <i>iCAP3 &amp; iCAP6</i>  | -1.15 | -0.05 (0.07) |
| <i>iCAP3 &amp; iCAP7</i>  | 1.63  | 0.07 (0.05)  |
| <i>iCAP3 &amp; iCAP8</i>  | -1.92 | -0.08 (0.05) |
| <i>iCAP3 &amp; iCAP9</i>  | 1.65  | 0.07 (0.06)  |
| <i>iCAP3 &amp; iCAP10</i> | -0.98 | -0.04 (0.07) |
| <i>iCAP3 &amp; iCAP11</i> | -0.36 | 0.01 (0.07)  |
| <i>iCAP3 &amp; iCAP12</i> | -2.72 | -0.13 (0.05) |
| <i>iCAP3 &amp; iCAP13</i> | -2.98 | -0.12 (0.04) |
| <i>iCAP4 &amp; iCAP5</i>  | -1.44 | -0.05 (0.06) |
| <i>iCAP4 &amp; iCAP6</i>  | 4.98  | 0.19 (0.04)  |
| <i>iCAP4 &amp; iCAP7</i>  | -0.52 | -0.01 (0.06) |
| <i>iCAP4 &amp; iCAP8</i>  | -1.18 | -0.06 (0.05) |
| <i>iCAP4 &amp; iCAP9</i>  | 0.06  | 0 (0.04)     |
| <i>iCAP4 &amp; iCAP10</i> | -3.83 | -0.17 (0.06) |
| <i>iCAP4 &amp; iCAP11</i> | -0.05 | -0.01 (0.06) |
| <i>iCAP4 &amp; iCAP12</i> | -2.07 | -0.09 (0.06) |
| <i>iCAP4 &amp; iCAP13</i> | -2.10 | -0.08 (0.04) |
| <i>iCAP5 &amp; iCAP6</i>  | 1.75  | 0.07 (0.06)  |
| <i>iCAP5 &amp; iCAP7</i>  | -0.09 | -0.03 (0.07) |
| <i>iCAP5 &amp; iCAP8</i>  | -9.46 | -0.21 (0.03) |
| <i>iCAP5 &amp; iCAP9</i>  | -2.59 | -0.15 (0.06) |
| <i>iCAP5 &amp; iCAP10</i> | -3.98 | -0.14 (0.05) |
| <i>iCAP5 &amp; iCAP11</i> | -0.01 | 0.01 (0.05)  |
| <i>iCAP5 &amp; iCAP12</i> | 0.32  | 0.02 (0.05)  |
| <i>iCAP5 &amp; iCAP13</i> | -2.36 | -0.09 (0.05) |
| <i>iCAP6 &amp; iCAP7</i>  | -0.14 | -0.02 (0.08) |
| <i>iCAP6 &amp; iCAP8</i>  | -1.61 | -0.06 (0.06) |
| <i>iCAP6 &amp; iCAP9</i>  | -4.83 | -0.21 (0.05) |
| <i>iCAP6 &amp; iCAP10</i> | 0.43  | 0.02 (0.07)  |
| <i>iCAP6 &amp; iCAP11</i> | -0.72 | -0.04 (0.06) |
| <i>iCAP6 &amp; iCAP12</i> | -0.34 | -0.01 (0.04) |
| <i>iCAP6 &amp; iCAP13</i> | -3.51 | -0.15 (0.05) |
| <i>iCAP7 &amp; iCAP8</i>  | 0.04  | 0.01 (0.07)  |

|                            |       |              |
|----------------------------|-------|--------------|
| <i>iCAP7 &amp; iCAP9</i>   | -1.67 | -0.08 (0.05) |
| <i>iCAP7 &amp; iCAP10</i>  | -0.09 | 0 (0.06)     |
| <i>iCAP7 &amp; iCAP11</i>  | -1.88 | -0.07 (0.06) |
| <i>iCAP7 &amp; iCAP12</i>  | -2.84 | -0.12 (0.06) |
| <i>iCAP7 &amp; iCAP13</i>  | 0.19  | 0 (0.05)     |
| <i>iCAP8 &amp; iCAP9</i>   | -1.71 | -0.07 (0.06) |
| <i>iCAP8 &amp; iCAP10</i>  | -3.07 | -0.12 (0.05) |
| <i>iCAP8 &amp; iCAP11</i>  | -0.20 | 0.01 (0.06)  |
| <i>iCAP8 &amp; iCAP12</i>  | 3.50  | 0.13 (0.04)  |
| <i>iCAP8 &amp; iCAP13</i>  | -2.21 | -0.1 (0.06)  |
| <i>iCAP9 &amp; iCAP10</i>  | 4.55  | 0.14 (0.04)  |
| <i>iCAP9 &amp; iCAP11</i>  | -2.64 | -0.09 (0.05) |
| <i>iCAP9 &amp; iCAP12</i>  | -3.24 | -0.12 (0.04) |
| <i>iCAP9 &amp; iCAP13</i>  | -4.14 | -0.12 (0.05) |
| <i>iCAP10 &amp; iCAP11</i> | -1.77 | -0.07 (0.05) |
| <i>iCAP10 &amp; iCAP12</i> | -1.07 | -0.05 (0.06) |
| <i>iCAP10 &amp; iCAP13</i> | -0.67 | -0.03 (0.04) |
| <i>iCAP11 &amp; iCAP12</i> | -2.41 | -0.09 (0.04) |
| <i>iCAP11 &amp; iCAP13</i> | -4.10 | -0.13 (0.04) |
| <i>iCAP12 &amp; iCAP13</i> | -0.56 | -0.02 (0.07) |
